# Supplementary material for: Mapping outcomes for recovery of consciousness in studies from 1986 to 2020: a scoping review protocol
Source: PubMed Central journal article supplement — BMJ Open. 2022 Jun 30;12(6):e056538. doi: 10.1136/bmjopen-2021-056538 (PMC9247663; doi:10.1136/bmjopen-2021-056538), 2022-06-30
Supplement: bmjopen-2021-056538.draft_revisions.pdf [file bmjopen-2021-056538.draft_revisions.pdf]

# BMJ Open

BMJ Open is committed to open peer review. As part of this commitment we make the peer review history of every article we publish publicly available.

When an article is published we post the peer reviewers' comments and the authors' responses online. We also post the versions of the paper that were used during peer review. These are the versions that the peer review comments apply to.

The versions of the paper that follow are the versions that were submitted during the peer review process. They are not the versions of record or the final published versions. They should not be cited or distributed as the published version of this manuscript.

BMJ Open is an open access journal and the full, final, typeset and author-corrected version of record of the manuscript is available on our site with no access controls, subscription charges or pay-per-view fees (<http://bmjopen.bmj.com>).

If you have any questions on BMJ Open's open peer review process please email [info.bmjopen@bmj.com](mailto:info.bmjopen@bmj.com)

# BMJ Open

## Mapping Outcomes for Recovery of Consciousness in Studies from 1986 to 2020: A scoping review protocol

|                               |                                                                                                                                                                                                                                                                                                                                                                                                                                                                                                                                                                                                                                                                                                                                                                                                                                                                                                                                                                                                                                                                                                                                                                                                              |
|-------------------------------|--------------------------------------------------------------------------------------------------------------------------------------------------------------------------------------------------------------------------------------------------------------------------------------------------------------------------------------------------------------------------------------------------------------------------------------------------------------------------------------------------------------------------------------------------------------------------------------------------------------------------------------------------------------------------------------------------------------------------------------------------------------------------------------------------------------------------------------------------------------------------------------------------------------------------------------------------------------------------------------------------------------------------------------------------------------------------------------------------------------------------------------------------------------------------------------------------------------|
| Journal:                      | <i>BMJ Open</i>                                                                                                                                                                                                                                                                                                                                                                                                                                                                                                                                                                                                                                                                                                                                                                                                                                                                                                                                                                                                                                                                                                                                                                                              |
| Manuscript ID                 | bmjopen-2021-056538                                                                                                                                                                                                                                                                                                                                                                                                                                                                                                                                                                                                                                                                                                                                                                                                                                                                                                                                                                                                                                                                                                                                                                                          |
| Article Type:                 | Protocol                                                                                                                                                                                                                                                                                                                                                                                                                                                                                                                                                                                                                                                                                                                                                                                                                                                                                                                                                                                                                                                                                                                                                                                                     |
| Date Submitted by the Author: | 18-Aug-2021                                                                                                                                                                                                                                                                                                                                                                                                                                                                                                                                                                                                                                                                                                                                                                                                                                                                                                                                                                                                                                                                                                                                                                                                  |
| Complete List of Authors:     | Weaver, Jennifer; Colorado State University College of Health and Human Sciences, Department of Occupational Therapy; The George Washington University School of Medicine and Health Sciences<br>Cogan, Alison; Veterans Affairs Greater Los Angeles Healthcare System<br>Bhandari, Parie; The George Washington University School of Medicine and Health Sciences<br>Awan, Bint-e; The George Washington University School of Medicine and Health Sciences<br>Jacobs, Erica; The George Washington University School of Medicine and Health Sciences<br>Pape, Ariana; The George Washington University School of Medicine and Health Sciences<br>Nguyen, Chantal; The George Washington University School of Medicine and Health Sciences<br>Guernon, Ann; Lewis University - College of Nursing and Health Professions; Hines Veterans Affairs Hospital<br>Harrod, Tom; The George Washington University School of Medicine and Health Sciences<br>Team, Recovery of Consciousness; The George Washington University School of Medicine and Health Sciences<br>Pape, Theresa; Hines Veterans Affairs Hospital<br>Mallinson, Trudy; The George Washington University School of Medicine and Health Sciences |
| Keywords:                     | REHABILITATION MEDICINE, Protocols & guidelines < HEALTH SERVICES ADMINISTRATION & MANAGEMENT, Neurological injury < NEUROLOGY                                                                                                                                                                                                                                                                                                                                                                                                                                                                                                                                                                                                                                                                                                                                                                                                                                                                                                                                                                                                                                                                               |
|                               |                                                                                                                                                                                                                                                                                                                                                                                                                                                                                                                                                                                                                                                                                                                                                                                                                                                                                                                                                                                                                                                                                                                                                                                                              |

SCHOLARONE™  
Manuscripts

1  
2  
3 1 **Mapping Outcomes for Recovery of Consciousness in Studies from 1986 to 2020: A scoping**  
4  
5  
6 2 **review protocol**

7  
8 3 Jennifer Weaver, PhD<sup>1,2</sup>; Alison Cogan, PhD<sup>3</sup>; Parie Bhandari, BA<sup>2</sup>; Bint-e Awan, BA<sup>2</sup>; Erica  
9  
10 4 Jacobs, BS<sup>2</sup>; Ariana Pape, MD<sup>2</sup>; Chantal Nguyen, MD<sup>2</sup>; Ann Guernon, PhD<sup>4,5</sup>; Tom Harrod,  
11  
12 5 MLS, MS<sup>2</sup>; The Recon Team; Theresa Bender Pape, DrPH<sup>5</sup>; Trudy Mallinson, PhD<sup>2</sup>  
13  
14  
15 6

16  
17 7 <sup>1</sup>College of Health and Human Sciences, Colorado State University; <sup>2</sup>School of Medicine and  
18  
19 8 Health Sciences, The George Washington University, Washington, DC; <sup>3</sup>Veterans Affairs  
20  
21 9 Greater Los Angeles Healthcare System, Los Angeles, CA, <sup>4</sup>College of Nursing and Health  
22  
23 10 Sciences, Lewis University, Romeoville, IL; <sup>5</sup>Hines Veterans Affairs Hospital, Hines, IL  
24  
25  
26 11

27  
28 12 **Corresponding Author:** Jennifer Weaver, PhD

29  
30  
31 13 Assistant Professor, Department of Occupational Therapy, College of Health and Human  
32  
33 14 Sciences, Colorado State University, 1573 Campus Delivery, Fort Collins, CO 80523. Email:  
34  
35 15 [jen.weaver@colostate.edu](mailto:jen.weaver@colostate.edu)  
36  
37

38 16 **Acknowledgements:** The Recovery of Consciousness (RECON) team includes Joshua Rosenow,  
39  
40 17 MD; Marilyn Pacheco, MD; Monica Steiner, MD; Catherine Burrell Kestner, PT, DPT; Kelsey  
41  
42 18 Watters, OTR/L, BCPR; Elizabeth Yost, OTD, OTRL; Henk Eilander, PhD; Berno Overbeek,  
43  
44 19 MD; Sophie E. Leeds, MS, OTR/L; Kelly Krese, PT, DPT, NCS; Haylee Winden, DPT, NCS;  
45  
46 20 Mary Philbin, SLP; Stefani Cleaver, DPT; Vanessa Silva, MA; Konner Nelson, MA; André  
47  
48 21 Lindsey, PhD, CCC-SLP; Angela Hartman, OTD; Kristen Maisano, OTD; Erika Cooley; Jessica  
49  
50 22 Rudin Portnoff OTR/L, CBIS; Bailey Widener, MSOT, MPH, CBIS, OTR/L; Sarah  
51  
52  
53  
54  
55  
56  
57  
58  
59  
60

- 1  
2  
3 23 Hollingsworth, PT, DPT; Coty Wardwell, PT, DPT; Julianne Angel, OTR/L, CSRS, CBIS;  
4  
5 24 Ladan Hakima, OTD; Elizabeth Burns, PT, DPT, CBIS; and Jennifer Nebel.  
6  
7  
8  
9  
10  
11  
12  
13  
14  
15  
16  
17  
18  
19  
20  
21  
22  
23  
24  
25  
26  
27  
28  
29  
30  
31  
32  
33  
34  
35  
36  
37  
38  
39  
40  
41  
42  
43  
44  
45  
46  
47  
48  
49  
50  
51  
52  
53  
54  
55  
56  
57  
58  
59  
60

For peer review only

1  
2  
3 25 **Abstract**  
4

5 26 **Introduction:** Historically, heterogeneous outcome assessments have been used to measure  
6  
7  
8 27 recovery of consciousness in patients with disorders of consciousness (DoC) following traumatic  
9  
10 28 brain injury (TBI), making it difficult to compare across studies. To date, however, there is no  
11  
12 29 comprehensive review of clinical outcome assessments that are used in intervention studies of  
13  
14 30 adults with DoC. The objective of this scoping review is to develop a comprehensive inventory  
15  
16 31 of clinical outcome assessments for recovery of consciousness that have been used in clinical  
17  
18 32 studies of adults with DoC following TBI.  
19  
20

21 33 **Methods and Analysis:** The methodological framework for this review is: 1) identify the  
22  
23 34 research questions, 2) identify relevant studies, 3) select studies, 4) chart the data, 5) collate,  
24  
25 35 summarize and report results and 6) consult stakeholders to drive knowledge translation. We will  
26  
27 36 identify relevant studies by searching the following electronic bibliographic databases: PubMed,  
28  
29 37 Scopus, EMBASE, PsycINFO, and The Cochrane Library (including Cochrane Database of  
30  
31 38 Systematic Reviews, Cochrane Central Register of Controlled Trials, and Cochrane  
32  
33 39 Methodology Register). Criteria for article inclusion are published in the English-language, peer-  
34  
35 40 reviewed studies of interventions aimed at facilitating recovery of consciousness among adults ( $\geq$   
36  
37 41 18 years) with DoC following a severe TBI, published from January 1986 to December 2020.  
38  
39 42 Articles meeting inclusion criteria at this stage will undergo a full text review. We will chart the  
40  
41 43 data by applying the World Health Organization International Classification of Functioning,  
42  
43 44 Disability and Health Framework to identify the content areas of clinical outcome assessments.  
44  
45 45 To support knowledge translation efforts, we will involve clinicians and researchers experienced  
46  
47 46 in TBI care throughout the project from conceptualization of the study through dissemination of  
48  
49 47 results.  
50  
51  
52  
53  
54  
55  
56  
57  
58  
59  
60

1  
2  
3 48 **Dissemination:** Results will be presented at national conferences and published in peer reviewed  
4  
5 49 journals.

6  
7  
8 50 **Keywords:** Traumatic Brain Injury; Disorders of Consciousness; Common Data Elements,  
9  
10 51 Clinical Outcome Assessments

### 11 12 13 14 15 53 **Strengths and limitations of this study**

- 16  
17 54 • The proposed scoping review will result in a comprehensive catalogue of outcome  
18  
19 55 assessments utilized in traumatic brain injury research aimed at facilitating recovery of  
20  
21 56 consciousness among adults with DoC. These outcome assessments will be grouped  
22  
23 57 according to the WHO ICF domains and sub-domains in order to identify key trends and  
24  
25 58 gaps in concepts of interest.
- 26  
27 59 • To the authors' knowledge, this will be the first study to identify whether the introduction  
28  
29 60 of NINDS CDEs influenced outcome assessment reporting among studies that received  
30  
31 61 federal funding in the United States.
- 32  
33 62 • Our search is limited to articles published since 1986, therefore we may miss outcome  
34  
35 63 assessments for DoC that were used prior to this date.
- 36  
37 64 • It is possible that our search strategy will miss relevant studies; we will mitigate this risk  
38  
39 65 by searching multiple databases and manually searching review articles and meta-  
40  
41 66 analyses.
- 42  
43 67 • Studies reporting US federal funding published after the introduction of NINDS CDEs  
44  
45 68 may have been conducted prior to 2010 and therefore the authors may not have been  
46  
47 69 strongly encouraged to use NINDS CDEs.
- 48  
49  
50  
51  
52  
53  
54  
55  
56  
57  
58  
59  
60

## INTRODUCTION

### 72 **Rationale**

73 To date, there has been limited success in clinical trials for treatment of patients with severe  
74 traumatic brain injury (TBI) that result in disorders of consciousness (DoC).<sup>1-3</sup> Representing a  
75 continuum of impaired consciousness, DoC is based on a person's ability to demonstrate arousal  
76 and/or awareness. The DoC continuum includes comatose, vegetative state/unresponsive  
77 wakefulness syndrome, minimally conscious state, and emergence from the minimally conscious  
78 state.<sup>4</sup> Recovery of consciousness for people with DoC following a severe TBI is uncertain and  
79 difficult to predict.<sup>5-7</sup> Accurate measurement of recovery of consciousness for people in DoC is  
80 essential for diagnosis and prognosis as well as determining the efficacy and effectiveness of  
81 interventions.<sup>5,8-10</sup> To date, there has been no review of the range of clinical outcome assessments  
82 used in measuring recovery of consciousness.

83 Historically, measuring recovery of consciousness in clinical trials has involved a range  
84 of clinical outcome assessments measuring different concepts of interest (e.g., response to pain,  
85 awareness), making it difficult to compare results across studies.<sup>11-14</sup> The National Institute of  
86 Neurological Disorders and Stroke (NINDS), part of the US National Institutes of Health (NIH),  
87 established a set of Common Data Elements (CDEs) for TBI in 2010 with the goal of promoting  
88 comparability of study findings. Traumatic brain injury researchers applying for United States  
89 (US) federal funding sources including NIH, Department of Defense, Department of Veteran's  
90 Affairs are strongly encouraged to use NINDS CDEs for outcome measurement to improve  
91 comparability across trials. Further, a data repository for TBI research was created as a result of  
92 collaboration between NIH and the Federal Interagency Traumatic Brain Injury Research

93 Informatics System;<sup>15</sup> federally funded researchers may be required to submit their data to this  
 94 repository in the future. This requirement provides additional incentive to use NINDS CDEs.<sup>15-17</sup>

95 CDEs are categorized as core, basic, or supplemental. The ‘core’ designation indicates  
 96 data elements pertinent for all TBI studies. Basic CDEs are specific to studies of populations  
 97 within TBI, such as ‘concussion/mild TBI’, ‘acute hospitalized’, ‘moderate/severe TBI:  
 98 rehabilitation’, and ‘epidemiology’. Basic CDEs for ‘moderate/severe TBI: rehabilitation’  
 99 include, but are not limited to, pupil reactivity, death date and time, hospital discharge  
 100 destination, and alteration of consciousness duration.<sup>18</sup> Supplemental CDEs are optional and may  
 101 be appropriate depending on the research question and scope.<sup>16</sup> Only two supplemental CDEs are  
 102 related to recovery of consciousness in adults: the Galveston Orientation Amnesia Test and JFK  
 103 Coma Recovery Scale-Revised (CRS-R) (Table 1).<sup>18</sup>

104 Table 1. Examples of Common Data Elements

| Type of CDE           | Definition                                                                                                                          | Example of CDE                                                |
|-----------------------|-------------------------------------------------------------------------------------------------------------------------------------|---------------------------------------------------------------|
| General Core          | Recommended for all NIH-funded studies:<br>General                                                                                  | C00031: Race<br>Expanded Category                             |
| Disease-specific Core | Recommended for all NIH-funded studies:<br>Disease specific (TBI)                                                                   | C01001: Glasgow<br>Coma Scale (GCS) -<br>motor response scale |
| Basic*                | Recommended for all TBI NIH-funded studies:<br>Specific to sub-diseases (e.g., Epidemiology and<br>Moderate/Severe: Rehabilitation) | C07155: Disability<br>Rating Scale Total<br>Score             |
| Supplemental          | Recommended for NIH-funded studies: Specific<br>to study design or type of research                                                 | C07145: JFK Coma<br>Recovery Scale-Revised<br>– Total Score   |

105 \*Basic CDEs are comparable to Supplemental-Highly Recommended CDEs for other diagnostic  
 106 categories.

107 Two studies have described the implementation of CDEs in TBI research.<sup>13,19</sup> Yue et al  
 108 (2013) described the implementation of CDEs for a multicenter prospective study and note  
 109 recommendations for future data collection procedures as well as the success in transferring the  
 110 data to FITBIR. Stead et al (2013) used CDEs to describe TBI patients in emergency



1  
2  
3 111 departments and were able to compare results to several other published studies. Although the  
4  
5 112 goal of the NINDS CDE project is to improve consistency and comparability across clinical  
6  
7 113 studies of patients with DoC following severe TBI by encouraging more consistent use of  
8  
9 114 clinical outcome assessments, there is currently no evidence to indicate whether this outcome has  
10  
11 115 been achieved.

## 14 116 **Objective**

16  
17 117 The primary objective of this scoping review is to develop a comprehensive inventory of  
18  
19 118 clinical outcome assessments in clinical trials aimed at recovery of consciousness for patients  
20  
21 119 with DoC after TBI. Secondary objectives are to examine the trends in primary outcomes over  
22  
23 120 time and whether reporting of NINDS CDEs increased after their introduction in 2010 in studies  
24  
25 121 that received US federal funding.

## 28 122 **METHODS AND ANALYSIS**

29  
30  
31 123 A scoping review is an appropriate method to achieve the stated objectives because we  
32  
33 124 want to identify characteristics of clinical outcome assessments used to evaluate the recovery of  
34  
35 125 consciousness following a severe TBI.<sup>20</sup> The scoping review will be conducted based on the  
36  
37 126 Arksey and O'Malley<sup>21</sup> methodological framework that has been refined by Levac et al<sup>22</sup>. The  
38  
39 127 methodological framework for this review will include: 1) identify the research questions, 2)  
40  
41 128 identify relevant studies, 3) select studies, 4) chart the data, 5) collate, summarize and report  
42  
43 129 results, and 6) stakeholder engagement to drive knowledge translation.<sup>21,22</sup>

### 46 130 **1. Identify the Research Questions**

#### 48 131 ***Primary question***

- 50  
51 132 • What clinical outcome assessments have been used in published studies about recovery of  
52  
53 133 consciousness for adults with severe TBI in states of disordered consciousness?

#### 55 134 ***Secondary questions***

- 1  
2  
3 135 • How have the outcomes assessments used to measure DoC in adults with severe TBI  
4  
5  
6 136 changed over time?  
7  
8 137 • Did frequency of reporting clinical outcome assessments classified as NINDS CDEs  
9  
10 138 change after their introduction in 2010 among federally funded studies in the US?

## 12 139 2. Identify Relevant Studies

14 140 The search strategy was developed in collaboration with a research librarian. Our search terms  
15  
16  
17 141 are broad to identify all eligible studies. These search terms encompass three primary categories:  
18  
19 142 severe TBI, recovery of consciousness, and outcomes.

### 21 143 *Search terms*

22  
23  
24 144 An in-depth outline of the full search strategy is reported in Table 2.

25  
26 145 Table 2. Examples of the search strategy that will generate the articles to review for the research  
27 146 question.

| 28 Database | 29 Search Terms                                                                                                                                                                                                                                                                                                                                                                                                                                                                                                                                                                                                                                                                                                                                                                                                                       | 30 Customization                    |
|-------------|---------------------------------------------------------------------------------------------------------------------------------------------------------------------------------------------------------------------------------------------------------------------------------------------------------------------------------------------------------------------------------------------------------------------------------------------------------------------------------------------------------------------------------------------------------------------------------------------------------------------------------------------------------------------------------------------------------------------------------------------------------------------------------------------------------------------------------------|-------------------------------------|
| 31 Cochrane | 32 (“traumatic brain injury”) OR (coma) OR (“persistent vegetative state”) OR (“minimally conscious state”) OR (“consciousness disorder”) OR (“disorder* of consciousness”) AND ((recovery) OR (“activities of daily living”) OR (awareness) OR (wakefulness)) AND (“critical care outcome”) OR (“treatment outcome”) OR (“outcome assessment”) OR (evaluation) OR (assessment))                                                                                                                                                                                                                                                                                                                                                                                                                                                      | 33 1987-2020, all publication types |
| 34 Embase   | 35 ((exp traumatic brain injury/ OR traumatic brain injur*.ti,ab.) OR (exp coma/ OR coma*.ti,ab.) OR (exp persistent vegetative state/ OR persistent vegetative state*.ti,ab.) OR (exp minimally conscious state/ OR minimally conscious state*.ti,ab.) OR (exp consciousness disorder/ OR consciousness disorder*.ti,ab. OR disorder* of consciousness.ti,ab.)) AND ((exp convalescence/ OR convalescence.ti,ab. OR recover*.ti,ab.) OR (exp daily life activity/ OR daily life activit*.ti,ab. OR activit* of daily living.ti,ab.) OR (exp awareness/ OR awareness.ti,ab.) OR (exp wakefulness/ OR wakefulness.ti,ab.)) AND ((exp critical care outcome/ OR critical care outcome*.ti,ab.) OR (exp treatment outcome/ OR treatment outcome*.ti,ab.) OR (exp evaluation*.ti,ab.) OR (exp outcome assessment/ OR assessment*.ti,ab.)) | 36 English, 1986-2020               |
| 37 PsycInfo | 38 (SU (“traumatic brain injur”) OR TI (“traumatic brain injur”) OR AB (“traumatic brain injur”) OR SU (coma*) OR TI (coma*) OR AB (coma*) OR SU (“persistent vegetative state”) OR TI (“persistent                                                                                                                                                                                                                                                                                                                                                                                                                                                                                                                                                                                                                                   | 39 1/1987-12/31/2020, English only  |

|        |                                                                                                                                                                                                                                                                                                                                                                                                                                                                                                                                                                                                                                                                                                                                                                                                                                                                                                                                                                                                                                                                                                       |                                                          |
|--------|-------------------------------------------------------------------------------------------------------------------------------------------------------------------------------------------------------------------------------------------------------------------------------------------------------------------------------------------------------------------------------------------------------------------------------------------------------------------------------------------------------------------------------------------------------------------------------------------------------------------------------------------------------------------------------------------------------------------------------------------------------------------------------------------------------------------------------------------------------------------------------------------------------------------------------------------------------------------------------------------------------------------------------------------------------------------------------------------------------|----------------------------------------------------------|
|        | <p>vegetative state*”) OR AB (“persistent vegetative state*”) OR SU (“minimally conscious state*”) OR TI (“minimally conscious state*”) OR AB (“minimally conscious state*”) OR SU (“consciousness disorder*”) OR TI (“consciousness disorder*”) OR AB (“consciousness disorder*”) OR SU (“disorder* of consciousness”) OR TI (“disorder* of consciousness”) OR AB (“disorder* of consciousness”) AND (SU (recover*) OR TI (recover*) OR AB (recover*) OR SU (“activit* of daily living”) OR TI (“activit* of daily living”) OR AB (“activit* of daily living”) OR SU (awareness) OR TI (awareness) OR AB (awareness) OR SU (wakefulness) OR TI (wakefulness) OR AB (wakefulness)) AND (SU (“critical care outcome*”) OR TI (“critical care outcome*”) OR AB (“critical care outcome*”) OR SU (“treatment outcome*”) OR TI (“treatment outcome*”) OR AB (“treatment outcome*”) OR SU (“outcome assessment*”) OR TI (“outcome assessment*”) OR AB (“outcome assessment*”) OR SU (evaluation*) OR TI (evaluation*) OR AB (evaluation*) OR SU (assessment*) OR TI (assessment*) OR AB (assessment*))</p> |                                                          |
| PubMed | <p>(Severe Traumatic Brain Injury [tiab] OR Brain Injuries, Traumatic [mesh] OR traumatic brain injury [tiab] OR coma, post-head injury [mesh] OR persistent vegetative state [mesh] OR minimally conscious state [tiab] OR consciousness disorders [mesh] OR disorders of consciousness [tiab]) AND (recovery [tiab] OR recovery of function [mesh] OR activities of daily living [mesh] OR awareness [mesh] OR awareness [tiab] OR wakefulness [mesh] OR wakefulness [tiab]) AND (Critical care outcomes [mesh] OR treatment outcome [mesh] OR "outcome assessment (health care)" [mesh] OR disability evaluation [mesh] OR evaluation [tiab] OR patient outcome assessment [mesh] OR assessment [tiab])</p>                                                                                                                                                                                                                                                                                                                                                                                        | <p>Humans,<br/>English,<br/>1/1/1986-<br/>12/31/2020</p> |
| Scopus | <p>(TITLE-ABS-KEY (“traumatic brain injur*”) OR TITLE-ABS-KEY (coma*) OR TITLE-ABS-KEY (“persistent vegetative state*”) OR TITLE-ABS-KEY (“minimally conscious state*”) OR TITLE-ABS-KEY (“consciousness disorder*”) OR TITLE-ABS-KEY (“disorder* of consciousness”)) AND (TITLE-ABS-KEY (recover*) OR TITLE-ABS-KEY (“activit* of daily living”) OR TITLE-ABS-KEY (awareness) OR TITLE-ABS-KEY (wakefulness)) AND (TITLE-ABS-KEY (“critical care outcome*”) OR TITLE-ABS-KEY (“treatment outcome*”) OR TITLE-ABS-KEY (“outcome assessment*”) OR TITLE-ABS-KEY (evaluation*) OR TITLE-ABS-KEY (assessment*))</p>                                                                                                                                                                                                                                                                                                                                                                                                                                                                                      | <p>English</p>                                           |

147 \*Search dates will include January 1, 1986 to December 31, 2020

148 **Information sources**

1  
2  
3 149 We will search the following electronic bibliographic databases: PubMed, Scopus, EMBASE,  
4  
5 150 PsycINFO, and The Cochrane Library (including Cochrane Database of Systematic Reviews,  
6  
7 151 Cochrane Central Register of Controlled Trials, and Cochrane Methodology Register).  
8  
9

10 152 ***Synthesis of eligibility criteria***  
11

12 153 This review will include all published, peer-reviewed studies using an intervention/treatment to  
13  
14 154 facilitate recovery of consciousness for adults ( $\geq 18$  years) with DoC following severe TBI  
15  
16  
17 155 (Table 3).  
18  
19  
20  
21  
22  
23  
24  
25  
26  
27  
28  
29  
30  
31  
32  
33  
34  
35  
36  
37  
38  
39  
40  
41  
42  
43  
44  
45  
46  
47  
48  
49  
50  
51  
52  
53  
54  
55  
56  
57  
58  
59  
60

176 Table 3. Inclusion and exclusion criteria for the scoping review.

| Category               | Inclusion Criteria                                                                                                                                                                                                                                                                                                              | Exclusion Criteria                                                                                                                                                                                                                                                                 |
|------------------------|---------------------------------------------------------------------------------------------------------------------------------------------------------------------------------------------------------------------------------------------------------------------------------------------------------------------------------|------------------------------------------------------------------------------------------------------------------------------------------------------------------------------------------------------------------------------------------------------------------------------------|
| Language               | English                                                                                                                                                                                                                                                                                                                         |                                                                                                                                                                                                                                                                                    |
| Publication Date Range | January 1986 to December 2020                                                                                                                                                                                                                                                                                                   | Before 1986                                                                                                                                                                                                                                                                        |
| Participant Age        | Participant age: $\geq 18$ years of age<br>At least one participant in the study was $\geq 18$ years of age                                                                                                                                                                                                                     | All participants were under 18 years of age                                                                                                                                                                                                                                        |
| Participant Diagnosis  | Participant diagnosis: Disordered Consciousness (DoC) following severe TBI<br>DoC was established utilizing a known assessment for evaluating states of consciousness such as the Coma Recovery Scale-Revised (CRS-R) or Glasgow Coma Scale $\leq 8$<br>At least one participant in the study was diagnosed with DoC from a TBI | Participants had brain pathologies such as Alzheimer's Disease or non-traumatic brain injury, and/or were conscious, alert, and oriented<br>Participants had a Diagnostics and Statistical Manual of Mental Disorders (5 <sup>th</sup> edition) diagnosis of psychiatric disorders |
| Intervention           | Intervention aimed at facilitating recovery of consciousness                                                                                                                                                                                                                                                                    | Purpose of intervention was not described as facilitating recovery of consciousness                                                                                                                                                                                                |
| Study Design           | All designs of primary, peer-reviewed studies including randomized control trials, observational studies, cohort studies, case control studies, case series, and case reports                                                                                                                                                   | Qualitative studies; meta analyses, systematic reviews, and scoping reviews                                                                                                                                                                                                        |

177

178 *Language:* English179 *Publication date:* January 1986 to December 2020

180 *Study Design:* This review will consider all designs of peer-reviewed studies including  
 181 randomized control trials, observational studies, cohort studies, case control studies, case series,  
 182 and case reports. Meta-analyses and review articles will be excluded.

1  
2  
3 183 *Setting:* This review will include intervention studies delivered in any setting to adults with DoC  
4  
5 184 following a severe TBI. There is no restriction on country of origin.

6  
7 185 *Participants:* For a study to be included in this review, at least one participant in the study must  
8  
9 186 have DoC following a severe TBI. A severe TBI resulting in DoC is defined as: a) Glasgow  
10  
11 187 Coma Scale (GCS) score of 3-8<sup>12</sup> or b) an assessment known for evaluating states of  
12  
13 188 consciousness, such as the CRS-R.<sup>5,8</sup> Studies will be excluded if all participants were under 18  
14  
15 189 years of age, had a Diagnostic and Statistical Manual of Mental Disorders (5<sup>th</sup> edition) diagnosis  
16  
17 190 of a psychiatric disorder, had brain pathologies such as Alzheimer's Disease or non-traumatic  
18  
19 191 brain injury, or were conscious, alert, and oriented. All non-human studies will be excluded.

20  
21 192 *Interventions:* Examples of interventions to be included are medication, nutrition, rehabilitation  
22  
23 193 therapy, non-invasive brain stimulation, and surgery. Studies will be excluded if the purpose of  
24  
25 194 the intervention/treatment provided was not described as facilitating recovery of consciousness.

### 31 **3. Select Studies**

32  
33 196 Following the search, each identified article will be uploaded to Endnote, a reference  
34  
35 197 management system. Duplicate articles will be removed. Titles and abstracts will be screened by  
36  
37 198 two independent reviewers to assess whether articles meet inclusion criteria (Table 4). If studies  
38  
39 199 are meta-analyses or reviews that are relevant to the research question, we will search the  
40  
41 200 reference list. Articles that are included by the screening process will undergo a full text review.  
42  
43 201 Two independent reviewers will read the full text articles to make a final determination of  
44  
45 202 inclusion. Articles that do not meet inclusion criteria at this stage will be excluded from the final  
46  
47 203 sample, with rationale documented. Discrepancies about inclusion of articles will be resolved  
48  
49 204 through further discussion and/or input by a third reviewer.

50  
51  
52  
53  
54 205

206 Table 4. Title and abstract review form

| Questions                                                                      |                                                                                                                           |
|--------------------------------------------------------------------------------|---------------------------------------------------------------------------------------------------------------------------|
| 1. Is the article written in English?                                          | <input type="checkbox"/> Yes<br><input type="checkbox"/> No                                                               |
| 2. Is the article published after 1985?                                        | <input type="checkbox"/> Yes<br><input type="checkbox"/> No                                                               |
| 3. Is the article about human subjects?                                        | <input type="checkbox"/> Yes<br><input type="checkbox"/> No                                                               |
| a. Are the human subject's adults ( $\geq 18$ years)                           | <input type="checkbox"/> Yes<br><input type="checkbox"/> No<br><input type="checkbox"/> Unsure, requires full text review |
| b. Do the adults have a traumatic brain injury?                                | <input type="checkbox"/> Yes<br><input type="checkbox"/> No<br><input type="checkbox"/> Unsure, requires full text review |
| c. Are the adults unconscious?                                                 | <input type="checkbox"/> Yes<br><input type="checkbox"/> No<br><input type="checkbox"/> Unsure, requires full text review |
| 4. Is the article about an intervention?                                       | <input type="checkbox"/> Yes<br><input type="checkbox"/> No<br><input type="checkbox"/> Unsure, requires full text review |
| a. Is the purpose of the intervention to facilitate recovery of consciousness? | <input type="checkbox"/> Yes<br><input type="checkbox"/> No<br><input type="checkbox"/> Unsure, requires full text review |
| b. Is it a meta-analysis, scoping review, or systematic review?                | <input type="checkbox"/> Yes → Exclude & search the reference list.<br><input type="checkbox"/> No                        |

207

208 **4. Chart the Data**

209 Data will be extracted from included articles by independent reviewers using a uniform data  
210 extraction tool developed for the study. A sample data extraction table is shown in Table 5.

211 Reviewers will use the Scottish Intercollegiate Guideline Network (SIGN) rating form to

212 evaluate study quality.<sup>23</sup> For each included article, data extraction will include details about the

1  
2  
3 213 year of publication, funding source, study aims, study design, number of participants (including  
4  
5 214 number lost to follow up), recruitment, study completion rate, demographics (age, injury  
6  
7 215 severity, days post-injury) of participants, clinical setting, specific intervention (including control  
8  
9 216 conditions, if applicable), primary and secondary outcomes, timing, and location of outcomes.  
10  
11  
12  
13  
14  
15  
16  
17  
18  
19  
20  
21  
22  
23  
24  
25  
26  
27  
28  
29  
30  
31  
32  
33  
34  
35  
36  
37  
38  
39  
40  
41  
42  
43  
44  
45  
46  
47  
48  
49  
50  
51  
52  
53  
54  
55  
56  
57  
58  
59  
60

217

For peer review only



218 Table 5. Data extraction form for full text review.

219

|                                                                                                                                                                                                                                                                                                                                                                                                                                                                                                             |  |
|-------------------------------------------------------------------------------------------------------------------------------------------------------------------------------------------------------------------------------------------------------------------------------------------------------------------------------------------------------------------------------------------------------------------------------------------------------------------------------------------------------------|--|
| <b>Study Information</b>                                                                                                                                                                                                                                                                                                                                                                                                                                                                                    |  |
| Study Title                                                                                                                                                                                                                                                                                                                                                                                                                                                                                                 |  |
| Year                                                                                                                                                                                                                                                                                                                                                                                                                                                                                                        |  |
| Funding Source                                                                                                                                                                                                                                                                                                                                                                                                                                                                                              |  |
| <b>Inclusion/Exclusion Criteria</b>                                                                                                                                                                                                                                                                                                                                                                                                                                                                         |  |
| Is the paper relevant to our research question, "What are the content areas of outcomes related to recovery of consciousness that have been used in clinical trials and/or intervention studies for adults with severe traumatic brain injury in states of disordered consciousness?" (i.e. there are outcome measures for people in disorders of consciousness following an intervention)                                                                                                                  |  |
| <p>Inclusion Criteria:</p> <ul style="list-style-type: none"> <li>• Adults (<math>\geq 18</math> years) with primary diagnosis of severe traumatic brain injury;</li> <li>• Identified brain injury is noted to be severe by Glasgow Coma Scale of 8 or less;</li> <li>• At least one of the study participants are in states of disorders of consciousness following a traumatic brain injury;</li> <li>• Addressed outcome related to recovery of consciousness;</li> <li>• Written in English</li> </ul> |  |

|                                                       |                                                                                                                                                                                                                                                                                                                                     |  |
|-------------------------------------------------------|-------------------------------------------------------------------------------------------------------------------------------------------------------------------------------------------------------------------------------------------------------------------------------------------------------------------------------------|--|
| 1<br>2<br>3<br>4<br>5<br>6<br>7<br>8<br>9<br>10<br>11 | Exclusion Criteria:<br>• People with documented history of psychiatric illness (DSM criteria), and/or organic brain syndrome such as Alzheimer's Disease.<br>• All study participants are fully conscious;<br>• All study participants are <18 years of age;<br>• Study participants include non-traumatic brain injury <i>only</i> |  |
| 12                                                    | <b>Study Details</b>                                                                                                                                                                                                                                                                                                                |  |
| 13                                                    | Study design                                                                                                                                                                                                                                                                                                                        |  |
| 14                                                    | Sample/number of participants: Include sample size and diagnoses (i.e. DoC following TBI, stroke, anoxia)                                                                                                                                                                                                                           |  |
| 15                                                    | Sample/demographics: age, injury severity, days post injury (if reported)                                                                                                                                                                                                                                                           |  |
| 16                                                    | Sample: The study's inclusion criteria                                                                                                                                                                                                                                                                                              |  |
| 17                                                    | Sample: The study's exclusion criteria                                                                                                                                                                                                                                                                                              |  |
| 18                                                    | <b>Data Collection Procedures</b>                                                                                                                                                                                                                                                                                                   |  |
| 19                                                    | Intervention characteristics (intervention(s), control condition(s), duration and protocol information)                                                                                                                                                                                                                             |  |
| 20                                                    | Primary outcome measure                                                                                                                                                                                                                                                                                                             |  |
| 21                                                    | Context of use for primary outcome measure                                                                                                                                                                                                                                                                                          |  |
| 22                                                    | Endpoint measure                                                                                                                                                                                                                                                                                                                    |  |
| 23                                                    | Secondary outcome measures                                                                                                                                                                                                                                                                                                          |  |
| 24                                                    | Were outcome measures transformed? (Yes/No)                                                                                                                                                                                                                                                                                         |  |
| 25                                                    | Timing of outcome measures                                                                                                                                                                                                                                                                                                          |  |
| 26                                                    | <b>Results</b>                                                                                                                                                                                                                                                                                                                      |  |
| 27                                                    | Observed sample                                                                                                                                                                                                                                                                                                                     |  |
| 28                                                    | Number of excluded participants                                                                                                                                                                                                                                                                                                     |  |

1  
2  
3  
4  
5  
6  
7  
8  
9  
10  
11  
12  
13  
14  
15  
16  
17  
18  
19  
20  
21  
22  
23  
24  
25  
26  
27  
28  
29  
30  
31  
32  
33  
34  
35  
36  
37  
38  
39  
40  
41  
42  
43  
44  
45  
46  
47

|                                                                    |  |
|--------------------------------------------------------------------|--|
| Number of participants lost to follow up                           |  |
| Primary Outcome (mean, proportion, other effect size index)        |  |
| Statistical analyses (description of groups, comparison of groups) |  |
| Key Findings                                                       |  |
| <i>**Complete SIGN Quality Rating Based on Study Design</i>        |  |

For peer review only

## 221 5. Collate, Summarize and Report Information

### 222 *Data analysis*

223 We will transfer information from the data extraction forms into STATA to complete descriptive  
224 analyses.

### 225 **Conceptual Framework and Key Concepts**

#### 226 *World Health Organization International Classification of Functioning, Disability and*

227 *Health*: Clinical outcome assessments will be categorized based on the World Health

228 Organization (WHO) International Classification of Functioning, Disability and Health (ICF)

229 framework using relevant concept of interest. This framework has two major components:

230 *Functioning and Disability* which includes the domains of Body Function, Body Structure, and

231 Activities and Participation that impact an individual's daily life; and *Contextual Factors* which

232 includes the domains of Personal Factors and Environmental Factors. Environmental Factors

233 consider the "physical, social and attitudinal environment in which people live and conduct their

234 lives."<sup>24</sup> Personal Factors include age, gender, and education; we will not apply this domain in

235 classifying outcome assessments since these generally represent covariates rather than

236 outcomes/endpoints.

237 Clinical outcome assessments will first be categorized into one of the four relevant WHO ICF

238 domains (body structures, body functions, activities and participation, environmental factors)

239 based on the concept of interest they are intended to measure. These categorizations will be

240 mutually exclusive in that each outcome assessment will only be assigned to one domain. ICF

241 domains can be further classified into subdomains.<sup>24</sup> We will also assign each outcome

242 assessment to a relevant sub-domain. Should an outcome assessment not fit into a WHO ICF

243 domain, we will create an 'Other' domain. Once all outcome assessments are categorized to a

1  
2  
3 244 domain, we will thematically analyze the outcome assessments in the ‘Other’ domain to  
4  
5 245 determine if a new domain is needed. For example, previous literature argues for the inclusion of  
6  
7  
8 246 quality of life as a domain.<sup>25</sup>  
9

10 247 **Common Data Elements:** We will also categorize outcome assessments as to whether they are a  
11  
12 248 NINDS CDE for moderate/severe TBI. We will test the significance of the introduction for  
13  
14  
15 249 CDEs on outcome reporting before and after 2010 using a chi-square test.  
16

### 17 250 **Presentation of results**

18  
19 251 Results will be presented via detailed quantitative and narrative summaries. First, we will present  
20  
21 252 the PRISMA-Scr flow diagram demonstrating the inclusion of studies.<sup>26,27</sup> We will also create an  
22  
23  
24 253 outcome map table that categorizes outcome assessments by WHO ICF domain and sub-domain.  
25  
26 254 We will create two figures to display (1) the frequency of WHO ICF sub-domains in order to  
27  
28 255 show the gaps in the concepts of interest that outcome assessments address by domain, and (2)  
29  
30  
31 256 the number and percent of studies that received US federal funding by year to show the  
32  
33 257 proportion that used a CDE as a primary outcome. In addition, we will present a 2x2 table of  
34  
35 258 CDE status and whether the publication was pre/post the introduction of CDEs.  
36

### 37 259 **Stakeholder Engagement**

38  
39  
40 260 Clinicians and researchers with extensive experience treating and studying recovery of  
41  
42 261 consciousness following a TBI have been involved in the development of this scoping review  
43  
44  
45 262 protocol. We have formed the Recovery of Consciousness (RECON) study team to continuously  
46  
47 263 engage these stakeholders throughout the scoping review process, inclusive of study selection  
48  
49 264 through dissemination of results.  
50

### 51 265 **Patient and Public Involvement**

52  
53  
54 266 No patient involvement.  
55  
56  
57  
58  
59  
60

1  
2  
3 267 **ETHICS AND DISSEMINATION**  
4

5 268 No ethical approval is required for this study as it is not determined to be human subjects  
6  
7  
8 269 research. Results will be presented at a national rehabilitation conference and submitted to a  
9  
10 270 peer-reviewed journal for publication.

11  
12 271 ***Reporting of protocol and study records***  
13

14 272 We registered this scoping review with PROSPERO (CRD42017058383). This study protocol  
15  
16  
17 273 and future reports will follow PRISMA-ScR guidelines for the publication of scoping reviews.<sup>26</sup>  
18  
19  
20  
21  
22  
23  
24  
25  
26  
27  
28  
29  
30  
31  
32  
33  
34  
35  
36  
37  
38  
39  
40  
41  
42  
43  
44  
45  
46  
47  
48  
49  
50  
51  
52  
53  
54  
55  
56  
57  
58  
59  
60

1  
2  
3 274 **Contributorship statement:** All authors meet ICJME authorship criteria.  
4

5 275 **Competing interests:** Authors have no disclosures.  
6

7  
8 276 **Funding:** This work was supported by the US Department of Defense under Grant W81XWH-  
9

10 277 14-1-0568; US Department of Defense under Grant JW150040.  
11  
12  
13  
14  
15  
16  
17  
18  
19  
20  
21  
22  
23  
24  
25  
26  
27  
28  
29  
30  
31  
32  
33  
34  
35  
36  
37  
38  
39  
40  
41  
42  
43  
44  
45  
46  
47  
48  
49  
50  
51  
52  
53  
54  
55  
56  
57  
58  
59  
60

1  
2  
3 **278 References**

- 4 279 1. Giacino JT, Whyte J, Bagiella E, et al. Placebo-controlled trial of amantadine for severe  
5  
6 280 traumatic brain injury. *New England Journal of Medicine*. 2012;366(9):819-826.  
7  
8  
9 281 2. Bender Pape TL, Livengood SL, Kletzel SL, et al. Neural Connectivity Changes  
10  
11 282 Facilitated by Familiar Auditory Sensory Training in Disordered Consciousness: A TBI  
12  
13 283 Pilot Study. *Frontiers in Neurology*. 2020;11(1027).  
14  
15  
16 284 3. Bender Pape TL, Rosenow JM, Steiner M, et al. Placebo-Controlled Trial of Familiar  
17  
18 285 Auditory Sensory Training for Acute Severe Traumatic Brain Injury: A Preliminary  
19  
20 286 Report. *Neurorehabilitation and neural repair*. 2015;29(6):537-547.  
21  
22  
23 287 4. Giacino JT, Whyte J, Nakase-Richardson R, et al. Minimum Competency  
24  
25 288 Recommendations for Programs That Provide Rehabilitation Services for Persons With  
26  
27 289 Disorders of Consciousness: A Position Statement of the American Congress of  
28  
29 290 Rehabilitation Medicine and the National Institute on Disability, Independent Living and  
30  
31 291 Rehabilitation Research Traumatic Brain Injury Model Systems. *Archives of physical*  
32  
33 292 *medicine and rehabilitation*. 2020;101(6):1072-1089.  
34  
35  
36 293 5. Giacino JT, Katz DI, Schiff ND, et al. Practice Guideline Update Recommendations  
37  
38 294 Summary: Disorders of Consciousness: Report of the Guideline Development,  
39  
40 295 Dissemination, and Implementation Subcommittee of the American Academy of  
41  
42 296 Neurology; the American Congress of Rehabilitation Medicine; and the National Institute  
43  
44 297 on Disability, Independent Living, and Rehabilitation Research. *Archives of physical*  
45  
46 298 *medicine and rehabilitation*. 2018;99(9).  
47  
48  
49  
50 299 6. Hammond F, Giacino J, Nakase-Richardson R, et al. Disorders of Consciousness due to  
51  
52 300 Traumatic Brain Injury: Functional Status Ten Years Post-Injury. *J Neurotrauma*. 2018.  
53  
54  
55  
56  
57  
58  
59  
60



- 1  
2  
3 301 7. Giacino JT, Katz DI, Schiff ND, et al. Comprehensive Systematic Review Update  
4  
5 302 Summary: Disorders of Consciousness: Report of the Guideline Development,  
6  
7 303 Dissemination, and Implementation Subcommittee of the American Academy of  
8  
9 304 Neurology; the American Congress of Rehabilitation Medicine; and the National Institute  
10  
11 305 on Disability, Independent Living, and Rehabilitation Research. *Archives of physical*  
12  
13 306 *medicine and rehabilitation*. 2018;99(9):1710-1719.  
14  
15  
16  
17 307 8. American Congress of Rehabilitation Medicine BI-ISIGDoCTF, Seel RT, Sherer M, et al.  
18  
19 308 Assessment scales for disorders of consciousness: evidence-based recommendations for  
20  
21 309 clinical practice and research. *Archives of physical medicine and rehabilitation*.  
22  
23 310 2010;91(12):1795-1813.  
24  
25  
26 311 9. Claassen J, Akbari Y, Alexander S, et al. Proceedings of the First Curing Coma  
27  
28 312 Campaign NIH Symposium: Challenging the Future of Research for Coma and Disorders  
29  
30 313 of Consciousness. *Neurocritical care*. 2021;35(1):4-23.  
31  
32  
33 314 10. Provencio JJ, Hemphill JC, Claassen J, et al. The Curing Coma Campaign: Framing  
34  
35 315 Initial Scientific Challenges-Proceedings of the First Curing Coma Campaign Scientific  
36  
37 316 Advisory Council Meeting. *Neurocritical care*. 2020;33(1):1-12.  
38  
39  
40 317 11. Maas AIMD, Harrison-Felix CLP, Menon DMD, et al. Common Data Elements for  
41  
42 318 Traumatic Brain Injury: Recommendations From the Interagency Working Group on  
43  
44 319 Demographics and Clinical Assessment. *Archives of physical medicine and*  
45  
46 320 *rehabilitation*. 2010;91(11):1641-1649.  
47  
48  
49 321 12. Maas AIR, Harrison-Felix CL, Menon D, et al. Standardizing Data Collection in  
50  
51 322 Traumatic Brain Injury. *Journal of Neurotrauma*. 2011;28(2):177-187.  
52  
53  
54  
55  
56  
57  
58  
59  
60

- 1  
2  
3 323 13. Yue JK, Vassar MJ, Lingsma HF, et al. Transforming Research and Clinical Knowledge  
4  
5 324 in Traumatic Brain Injury Pilot: Multicenter Implementation of the Common Data  
6  
7 325 Elements for Traumatic Brain Injury. *Journal of neurotrauma*. 2013;30(22):1831-1844.  
8  
9  
10 326 14. Thurmond VA, Hicks R, Gleason T, et al. Advancing Integrated Research in  
11  
12 327 Psychological Health and Traumatic Brain Injury: Common Data Elements. *Archives of*  
13  
14 328 *physical medicine and rehabilitation*. 2010;91(11):1633-1636.  
15  
16  
17 329 15. Thompson HJ, Vavilala MS, Rivara FP. Chapter 1 Common Data Elements and Federal  
18  
19 330 Interagency Traumatic Brain Injury Research Informatics System for TBI Research.  
20  
21 331 *Annual review of nursing research*. 2015;33:1-11.  
22  
23  
24 332 16. Hicks R, Giacino J, Harrison-Felix C, Manley G, Valadka A, Wilde EA. Progress in  
25  
26 333 developing common data elements for traumatic brain injury research: Version two—The  
27  
28 334 end of the beginning. *Journal of neurotrauma*. 2013;30(22):1852-1861.  
29  
30  
31 335 17. Sheehan J, Hirschfeld S, Foster E, et al. Improving the value of clinical research through  
32  
33 336 the use of Common Data Elements. *Clinical Trials*. 2016;13(6):671-676.  
34  
35  
36 337 18. National Institute of Neurological Disorders and Stroke. Common Data Elements Search.  
37  
38 338 Common Data Elements Web site. <https://www.commondataelements.ninds.nih.gov/>.  
39  
40 339 Published 2021. Accessed July 15, 2021.  
41  
42  
43 340 19. Stead LG, Bodhit AN, Patel PS, et al. TBI surveillance using the common data elements  
44  
45 341 for traumatic brain injury: a population study. *International Journal of Emergency*  
46  
47 342 *Medicine*. 2013;6(1):5.  
48  
49  
50 343 20. Munn Z, Peters MDJ, Stern C, Tufanaru C, McArthur A, Aromataris E. Systematic  
51  
52 344 review or scoping review? Guidance for authors when choosing between a systematic or  
53  
54 345 scoping review approach. *BMC Medical Research Methodology*. 2018;18(1):143.  
55  
56  
57  
58  
59

- 1  
2  
3 346 21. Arksey H, O'Malley L. Scoping studies: towards a methodological framework. *Int J Soc*  
4  
5 347 *Res Methodol.* 2005;8.  
6  
7  
8 348 22. Levac D, Colquhoun H, O'Brien K. Scoping studies: advancing the methodology.  
9  
10 349 *Implement Sci.* 2010;5.  
11  
12 350 23. Scottish Intercollegiate Guideline Network. Critical appraisal notes and checklists. SIGN.  
13  
14 351 <https://www.sign.ac.uk/checklists-and-notes.html>. Published 2001. Accessed March 22,  
15  
16 352 2020.  
17  
18  
19 353 24. World Health Organization. Towards a Common Language for Functioning, Disability  
20  
21 354 and Health: The International Classification of Functioning, Disability and Health. In.  
22  
23 355 Geneva2002.  
24  
25  
26 356 25. McDougall J, Wright V, Rosenbaum P. The ICF model of functioning and disability:  
27  
28 357 incorporating quality of life and human development. *Dev Neurorehabil.* 2010;13(3):204-  
29  
30 358 211.  
31  
32  
33 359 26. Tricco AC, Lillie E, Zarin W, et al. PRISMA Extension for Scoping Reviews (PRISMA-  
34  
35 360 ScR): Checklist and Explanation. *Annals of Internal Medicine.* 2018;169(7):467-473.  
36  
37  
38 361 27. Liberati A, Altman DG, Tetzlaff J, et al. The PRISMA statement for reporting systematic  
39  
40 362 reviews and meta-analyses of studies that evaluate healthcare interventions: explanation  
41  
42 363 and elaboration. *BMJ.* 2009;339:b2700.  
43  
44  
45 364  
46  
47 365  
48  
49  
50  
51  
52  
53  
54  
55  
56  
57  
58  
59  
60

366

For peer review only

1  
2  
3  
4  
5  
6  
7  
8  
9  
10  
11  
12  
13  
14  
15  
16  
17  
18  
19  
20  
21  
22  
23  
24  
25  
26  
27  
28  
29  
30  
31  
32  
33  
34  
35  
36  
37  
38  
39  
40  
41  
42  
43  
44  
45  
46  
47  
48  
49  
50  
51  
52  
53  
54  
55  
56  
57  
58  
59  
60

**PRISMA-P (Preferred Reporting Items for Systematic review and Meta-Analysis Protocols) 2015 checklist: recommended items to address in a systematic review protocol\***

| Section and topic                 | Item No | Checklist item                                                                                                                                                                                                                | Page or Line number |
|-----------------------------------|---------|-------------------------------------------------------------------------------------------------------------------------------------------------------------------------------------------------------------------------------|---------------------|
| <b>ADMINISTRATIVE INFORMATION</b> |         |                                                                                                                                                                                                                               |                     |
| Title:                            |         |                                                                                                                                                                                                                               |                     |
| Identification                    | 1a      | Identify the report as a protocol of a systematic review                                                                                                                                                                      | Lines 1-2           |
| Update                            | 1b      | If the protocol is for an update of a previous systematic review, identify as such                                                                                                                                            | N/A                 |
| Registration                      | 2       | If registered, provide the name of the registry (such as PROSPERO) and registration number                                                                                                                                    | Line 272            |
| Authors:                          |         |                                                                                                                                                                                                                               |                     |
| Contact                           | 3a      | Provide name, institutional affiliation, e-mail address of all protocol authors; provide physical mailing address of corresponding author                                                                                     | Title page          |
| Contributions                     | 3b      | Describe contributions of protocol authors and identify the guarantor of the review                                                                                                                                           | Line 274            |
| Amendments                        | 4       | If the protocol represents an amendment of a previously completed or published protocol, identify as such and list changes; otherwise, state plan for documenting important protocol amendments                               | N/A                 |
| Support:                          |         |                                                                                                                                                                                                                               |                     |
| Sources                           | 5a      | Indicate sources of financial or other support for the review                                                                                                                                                                 | Lines 276-277       |
| Sponsor                           | 5b      | Provide name for the review funder and/or sponsor                                                                                                                                                                             | Lines 276-277       |
| Role of sponsor or funder         | 5c      | Describe roles of funder(s), sponsor(s), and/or institution(s), if any, in developing the protocol                                                                                                                            | N/A                 |
| <b>INTRODUCTION</b>               |         |                                                                                                                                                                                                                               |                     |
| Rationale                         | 6       | Describe the rationale for the review in the context of what is already known                                                                                                                                                 | Lines 2-115         |
| Objectives                        | 7       | Provide an explicit statement of the question(s) the review will address with reference to participants, interventions, comparators, and outcomes (PICO)                                                                      | Lines 116-121       |
| <b>METHODS</b>                    |         |                                                                                                                                                                                                                               |                     |
| Eligibility criteria              | 8       | Specify the study characteristics (such as PICO, study design, setting, time frame) and report characteristics (such as years considered, language, publication status) to be used as criteria for eligibility for the review | Lines 152-194       |
| Information sources               | 9       | Describe all intended information sources (such as electronic databases, contact with study authors, trial registers or other grey literature sources) with planned dates of coverage                                         | Lines 148-151       |
| Search strategy                   | 10      | Present draft of search strategy to be used for at least one electronic database, including planned limits,                                                                                                                   | Lines 143-147       |

|                                    |     |                                                                                                                                                                                                                                                  |                                                                             |
|------------------------------------|-----|--------------------------------------------------------------------------------------------------------------------------------------------------------------------------------------------------------------------------------------------------|-----------------------------------------------------------------------------|
|                                    |     | such that it could be repeated                                                                                                                                                                                                                   |                                                                             |
| Study records:                     |     |                                                                                                                                                                                                                                                  |                                                                             |
| Data management                    | 11a | Describe the mechanism(s) that will be used to manage records and data throughout the review                                                                                                                                                     | Lines 196-197                                                               |
| Selection process                  | 11b | State the process that will be used for selecting studies (such as two independent reviewers) through each phase of the review (that is, screening, eligibility and inclusion in meta-analysis)                                                  | Lines 197-204                                                               |
| Data collection process            | 11c | Describe planned method of extracting data from reports (such as piloting forms, done independently, in duplicate), any processes for obtaining and confirming data from investigators                                                           | Lines 208-221                                                               |
| Data items                         | 12  | List and define all variables for which data will be sought (such as PICO items, funding sources), any pre-planned data assumptions and simplifications                                                                                          | Lines 208-221                                                               |
| Outcomes and prioritization        | 13  | List and define all outcomes for which data will be sought, including prioritization of main and additional outcomes, with rationale                                                                                                             | Lines 208-221                                                               |
| Risk of bias in individual studies | 14  | Describe anticipated methods for assessing risk of bias of individual studies, including whether this will be done at the outcome or study level, or both; state how this information will be used in data synthesis                             | Lines 208-221                                                               |
| Data synthesis                     | 15a | Describe criteria under which study data will be quantitatively synthesised                                                                                                                                                                      |                                                                             |
|                                    | 15b | If data are appropriate for quantitative synthesis, describe planned summary measures, methods of handling data and methods of combining data from studies, including any planned exploration of consistency (such as $I^2$ , Kendall's $\tau$ ) |                                                                             |
|                                    | 15c | Describe any proposed additional analyses (such as sensitivity or subgroup analyses, meta-regression)                                                                                                                                            |                                                                             |
|                                    | 15d | If quantitative synthesis is not appropriate, describe the type of summary planned                                                                                                                                                               | Lines 251-258 (Scoping review quantitative and narrative summaries planned) |
| Meta-bias(es)                      | 16  | Specify any planned assessment of meta-bias(es) (such as publication bias across studies, selective reporting within studies)                                                                                                                    | N/A                                                                         |
| Confidence in cumulative evidence  | 17  | Describe how the strength of the body of evidence will be assessed (such as GRADE)                                                                                                                                                               | Lines 196-197                                                               |

**\* It is strongly recommended that this checklist be read in conjunction with the PRISMA-P Explanation and Elaboration (cite when available) for important clarification on the items. Amendments to a review protocol should be tracked and dated. The copyright for PRISMA-P (including checklist) is held by the PRISMA-P Group and is distributed under a Creative Commons Attribution Licence 4.0.**

*From: Shamseer L, Moher D, Clarke M, Ghersi D, Liberati A, Petticrew M, Shekelle P, Stewart L, PRISMA-P Group. Preferred reporting items for systematic review and meta-analysis protocols (PRISMA-P) 2015: elaboration and explanation. BMJ. 2015 Jan 2;349(jan02 1):g7647.*

# BMJ Open

## Mapping Outcomes for Recovery of Consciousness in Studies from 1986 to 2020: A scoping review protocol

|                                 |                                                                                                                                                                                                                                                                                                                                                                                                                                                                                                                                                                                                                                                                                                                                                                                                                                                                                                                                                                                                                                                                                                                                                                                                              |
|---------------------------------|--------------------------------------------------------------------------------------------------------------------------------------------------------------------------------------------------------------------------------------------------------------------------------------------------------------------------------------------------------------------------------------------------------------------------------------------------------------------------------------------------------------------------------------------------------------------------------------------------------------------------------------------------------------------------------------------------------------------------------------------------------------------------------------------------------------------------------------------------------------------------------------------------------------------------------------------------------------------------------------------------------------------------------------------------------------------------------------------------------------------------------------------------------------------------------------------------------------|
| Journal:                        | <i>BMJ Open</i>                                                                                                                                                                                                                                                                                                                                                                                                                                                                                                                                                                                                                                                                                                                                                                                                                                                                                                                                                                                                                                                                                                                                                                                              |
| Manuscript ID                   | bmjopen-2021-056538.R1                                                                                                                                                                                                                                                                                                                                                                                                                                                                                                                                                                                                                                                                                                                                                                                                                                                                                                                                                                                                                                                                                                                                                                                       |
| Article Type:                   | Protocol                                                                                                                                                                                                                                                                                                                                                                                                                                                                                                                                                                                                                                                                                                                                                                                                                                                                                                                                                                                                                                                                                                                                                                                                     |
| Date Submitted by the Author:   | 18-Mar-2022                                                                                                                                                                                                                                                                                                                                                                                                                                                                                                                                                                                                                                                                                                                                                                                                                                                                                                                                                                                                                                                                                                                                                                                                  |
| Complete List of Authors:       | Weaver, Jennifer; Colorado State University College of Health and Human Sciences, Department of Occupational Therapy; The George Washington University School of Medicine and Health Sciences<br>Cogan, Alison; Veterans Affairs Greater Los Angeles Healthcare System<br>Bhandari, Parie; The George Washington University School of Medicine and Health Sciences<br>Awan, Bint-e; The George Washington University School of Medicine and Health Sciences<br>Jacobs, Erica; The George Washington University School of Medicine and Health Sciences<br>Pape, Ariana; The George Washington University School of Medicine and Health Sciences<br>Nguyen, Chantal; The George Washington University School of Medicine and Health Sciences<br>Guernon, Ann; Lewis University - College of Nursing and Health Professions; Hines Veterans Affairs Hospital<br>Harrod, Tom; The George Washington University School of Medicine and Health Sciences<br>Team, Recovery of Consciousness; The George Washington University School of Medicine and Health Sciences<br>Pape, Theresa; Hines Veterans Affairs Hospital<br>Mallinson, Trudy; The George Washington University School of Medicine and Health Sciences |
| <b>Primary Subject Heading</b>: | Research methods                                                                                                                                                                                                                                                                                                                                                                                                                                                                                                                                                                                                                                                                                                                                                                                                                                                                                                                                                                                                                                                                                                                                                                                             |
| Secondary Subject Heading:      | Rehabilitation medicine                                                                                                                                                                                                                                                                                                                                                                                                                                                                                                                                                                                                                                                                                                                                                                                                                                                                                                                                                                                                                                                                                                                                                                                      |
| Keywords:                       | REHABILITATION MEDICINE, Protocols & guidelines < HEALTH SERVICES ADMINISTRATION & MANAGEMENT, Neurological injury < NEUROLOGY                                                                                                                                                                                                                                                                                                                                                                                                                                                                                                                                                                                                                                                                                                                                                                                                                                                                                                                                                                                                                                                                               |
|                                 |                                                                                                                                                                                                                                                                                                                                                                                                                                                                                                                                                                                                                                                                                                                                                                                                                                                                                                                                                                                                                                                                                                                                                                                                              |

SCHOLARONE™  
Manuscripts

1  
2  
3 1 **Mapping Outcomes for Recovery of Consciousness in Studies from 1986 to 2020: A scoping**  
4  
5  
6 2 **review protocol**

7  
8 3 Jennifer Weaver, PhD<sup>1,2</sup>; Alison Cogan, PhD<sup>3</sup>; Parie Bhandari, BA<sup>2</sup>; Bint-e Awan, BA<sup>2</sup>; Erica  
9  
10 4 Jacobs, BS<sup>2</sup>; Ariana Pape, MD<sup>2</sup>; Chantal Nguyen, MD<sup>2</sup>; Ann Guernon, PhD<sup>4,5</sup>; Tom Harrod,  
11  
12 5 MLS, MS<sup>2</sup>; The Recon Team; Theresa Bender Pape, DrPH<sup>5</sup>; Trudy Mallinson, PhD<sup>2</sup>  
13  
14  
15 6

16  
17 7 <sup>1</sup>College of Health and Human Sciences, Colorado State University; <sup>2</sup>School of Medicine and  
18  
19 8 Health Sciences, The George Washington University, Washington, DC; <sup>3</sup>Veterans Affairs  
20  
21 9 Greater Los Angeles Healthcare System, Los Angeles, CA, <sup>4</sup>College of Nursing and Health  
22  
23 10 Sciences, Lewis University, Romeoville, IL; <sup>5</sup>Hines Veterans Affairs Hospital, Hines, IL  
24  
25  
26 11

27  
28 12 **Corresponding Author:** Jennifer Weaver, PhD

29  
30  
31 13 Assistant Professor, Department of Occupational Therapy, College of Health and Human  
32  
33 14 Sciences, Colorado State University, 1573 Campus Delivery, Fort Collins, CO 80523. Email:  
34  
35 15 [jen.weaver@colostate.edu](mailto:jen.weaver@colostate.edu)  
36  
37

38 16 **Acknowledgements:** The Recovery of Consciousness (RECON) team includes Joshua Rosenow,  
39  
40 17 MD; Marilyn Pacheco, MD; Monica Steiner, MD; Catherine Burress Kestner, PT, DPT; Kelsey  
41  
42 18 Watters, OTR/L, BCPR; Elizabeth Yost, OTD, OTRL; Henk Eilander, PhD; Berno Overbeek,  
43  
44 19 MD; Sophie E. Leeds, MS, OTR/L; Kelly Krese, PT, DPT, NCS; Haylee Winden, DPT, NCS;  
45  
46 20 Mary Philbin, SLP; Stefani Cleaver, DPT; Vanessa Silva, MA; Konner Nelson, MA; André  
47  
48 21 Lindsey, PhD, CCC-SLP; Angela Hartman, OTD; Kristen Maisano, OTD; Erika Cooley; Jessica  
49  
50 22 Rudin Portnoff OTR/L, CBIS; Bailey Widener, MSOT, MPH, CBIS, OTR/L; Sarah  
51  
52  
53  
54  
55  
56  
57  
58  
59  
60



- 1  
2  
3 23 Hollingsworth, PT, DPT; Coty Wardwell, PT, DPT; Julianne Angel, OTR/L, CSRS, CBIS;  
4  
5 24 Ladan Hakima, OTD; Elizabeth Burns, PT, DPT, CBIS; and Jennifer Nebel.  
6  
7  
8  
9  
10  
11  
12  
13  
14  
15  
16  
17  
18  
19  
20  
21  
22  
23  
24  
25  
26  
27  
28  
29  
30  
31  
32  
33  
34  
35  
36  
37  
38  
39  
40  
41  
42  
43  
44  
45  
46  
47  
48  
49  
50  
51  
52  
53  
54  
55  
56  
57  
58  
59  
60

For peer review only

1  
2  
3 25 **Abstract**  
4

5 26 **Introduction:** Historically, heterogeneous outcome assessments have been used to measure  
6  
7  
8 27 recovery of consciousness in patients with disorders of consciousness (DoC) following traumatic  
9  
10 28 brain injury (TBI), making it difficult to compare across studies. To date, however, there is no  
11  
12 29 comprehensive review of clinical outcome assessments that are used in intervention studies of  
13  
14 30 adults with DoC. The objective of this scoping review is to develop a comprehensive inventory  
15  
16 31 of clinical outcome assessments for recovery of consciousness that have been used in clinical  
17  
18 32 studies of adults with DoC following TBI.  
19  
20

21 33 **Methods and Analysis:** The methodological framework for this review is: 1) identify the  
22  
23 34 research questions, 2) identify relevant studies, 3) select studies, 4) chart the data, 5) collate,  
24  
25 35 summarize and report results and 6) consult stakeholders to drive knowledge translation. We will  
26  
27 36 identify relevant studies by searching the following electronic bibliographic databases: PubMed,  
28  
29 37 Scopus, EMBASE, PsycINFO, and The Cochrane Library (including Cochrane Database of  
30  
31 38 Systematic Reviews, Cochrane Central Register of Controlled Trials, and Cochrane  
32  
33 39 Methodology Register). Criteria for article inclusion are published in the English-language, peer-  
34  
35 40 reviewed studies of interventions aimed at facilitating recovery of consciousness among adults ( $\geq$   
36  
37 41 18 years) with DoC following a severe TBI, published from January 1986 to December 2020.  
38  
39 42 Articles meeting inclusion criteria at this stage will undergo a full text review. We will chart the  
40  
41 43 data by applying the World Health Organization International Classification of Functioning,  
42  
43 44 Disability and Health Framework to identify the content areas of clinical outcome assessments.  
44  
45 45 To support knowledge translation efforts, we will involve clinicians and researchers experienced  
46  
47 46 in TBI care throughout the project from conceptualization of the study through dissemination of  
48  
49 47 results.  
50  
51  
52  
53  
54  
55  
56  
57  
58  
59  
60

1  
2  
3 48 **Ethics and Dissemination:** Results will be presented at national conferences and published in  
4  
5  
6 49 peer reviewed journals.

7  
8 50 **Keywords:** Traumatic Brain Injury; Disorders of Consciousness; Common Data Elements,  
9  
10 51 Clinical Outcome Assessments

11  
12 52

13  
14  
15 53 **Strengths and limitations of this study**

- 16  
17 54 • The proposed scoping review will result in a comprehensive catalogue of outcome  
18  
19 55 assessments utilized in traumatic brain injury research aimed at facilitating recovery of  
20  
21 56 consciousness among adults with DoC.  
22  
23  
24 57 • The outcome assessments will be grouped according to the WHO ICF domains and sub-  
25  
26 58 domains to identify key trends and gaps in concepts of interest.  
27  
28  
29 59 • To the authors' knowledge, this will be the first study to identify whether the introduction  
30  
31 60 of NINDS CDEs influenced outcome assessment reporting among studies that received  
32  
33 61 federal funding in the United States.  
34  
35  
36 62 • Studies reporting US federal funding published after the introduction of NINDS CDEs  
37  
38 63 may have been conducted prior to 2010 and therefore the authors may not have been  
39  
40 64 strongly encouraged to use NINDS CDEs.  
41  
42  
43 65 • It is possible that our search strategy will miss relevant studies; we will mitigate this risk  
44  
45 66 by searching multiple databases and manually searching review articles and meta-  
46  
47 67 analyses.  
48  
49  
50 68  
51  
52 69

## INTRODUCTION

### 71 **Rationale**

72 To date, there has been limited success in clinical trials for treatment of patients with severe  
73 traumatic brain injury (TBI) that result in disorders of consciousness (DoC).<sup>1-3</sup> Representing a  
74 continuum of impaired consciousness, DoC is based on a person's ability to demonstrate arousal  
75 and/or awareness. The DoC continuum includes comatose, vegetative state/unresponsive  
76 wakefulness syndrome, minimally conscious state, and emergence from the minimally conscious  
77 state.<sup>4</sup> Recovery of consciousness for people with DoC following a severe TBI is uncertain and  
78 difficult to predict.<sup>5-7</sup> Accurate measurement of recovery of consciousness for people in DoC is  
79 essential for diagnosis and prognosis as well as determining the efficacy and effectiveness of  
80 interventions.<sup>5,8-10</sup> To date, there has been no review of the range of clinical outcome assessments  
81 used in measuring recovery of consciousness.

82 Historically, measuring recovery of consciousness in clinical trials has involved a range  
83 of clinical outcome assessments measuring different concepts of interest (e.g., response to pain,  
84 awareness), making it difficult to compare results across studies.<sup>11-14</sup> The National Institute of  
85 Neurological Disorders and Stroke (NINDS), part of the US National Institutes of Health (NIH),  
86 established a set of Common Data Elements (CDEs) for TBI in 2010 with the goal of promoting  
87 comparability of study findings. Traumatic brain injury researchers applying for United States  
88 (US) federal funding sources including NIH, Department of Defense, Department of Veteran's  
89 Affairs are strongly encouraged to use NINDS CDEs for outcome measurement to improve  
90 comparability across trials. Further, a data repository for TBI research was created as a result of  
91 collaboration between NIH and the Federal Interagency Traumatic Brain Injury Research  
92 (FITBIR) Informatics System;<sup>15</sup> federally funded researchers may be required to submit their

93 data to this repository in the future. This requirement provides additional incentive to use NINDS  
94 CDEs.<sup>15-17</sup>

95 CDEs are categorized as core, basic, or supplemental. The ‘core’ designation indicates  
96 data elements pertinent for all TBI studies. Basic CDEs are specific to studies of populations  
97 within TBI, such as ‘concussion/mild TBI’, ‘acute hospitalized’, ‘moderate/severe TBI:  
98 rehabilitation’, and ‘epidemiology’. Basic CDEs for ‘moderate/severe TBI: rehabilitation’  
99 include, but are not limited to, pupil reactivity, death date and time, hospital discharge  
100 destination, and alteration of consciousness duration.<sup>18</sup> Supplemental CDEs are optional and may  
101 be appropriate depending on the research question and scope.<sup>16</sup> Only two supplemental CDEs are  
102 related to recovery of consciousness in adults: the Galveston Orientation Amnesia Test and JFK  
103 Coma Recovery Scale-Revised (CRS-R) (Table 1).<sup>18</sup>

104 Table 1. Examples of Common Data Elements

| Type of CDE           | Definition                                                                                                                          | Example of CDE                                                |
|-----------------------|-------------------------------------------------------------------------------------------------------------------------------------|---------------------------------------------------------------|
| General Core          | Recommended for all NIH-funded studies:<br>General                                                                                  | C00031: Race<br>Expanded Category                             |
| Disease-specific Core | Recommended for all NIH-funded studies:<br>Disease specific (TBI)                                                                   | C01001: Glasgow<br>Coma Scale (GCS) -<br>motor response scale |
| Basic*                | Recommended for all TBI NIH-funded studies:<br>Specific to sub-diseases (e.g., Epidemiology and<br>Moderate/Severe: Rehabilitation) | C07155: Disability<br>Rating Scale Total<br>Score             |
| Supplemental          | Recommended for NIH-funded studies: Specific<br>to study design or type of research                                                 | C07145: JFK Coma<br>Recovery Scale-Revised<br>– Total Score   |

105 \*Basic CDEs are comparable to Supplemental-Highly Recommended CDEs for other diagnostic  
106 categories.

107 Two studies have described the implementation of CDEs in TBI research.<sup>13,19</sup> Yue et al  
108 (2013) described the implementation of CDEs for a multicenter prospective study and note  
109 recommendations for future data collection procedures as well as the success in transferring the  
110 data to FITBIR. Stead et al (2013) used CDEs to describe TBI patients in emergency

1  
2  
3 111 departments and were able to compare results to several other published studies. Although the  
4  
5 112 goal of the NINDS CDE project is to improve consistency and comparability across clinical  
6  
7 113 studies of patients with DoC following severe TBI by encouraging more consistent use of  
8  
9 114 clinical outcome assessments, there is currently no evidence to indicate whether this outcome has  
10  
11 115 been achieved.

## 14 116 **Objective**

16  
17 117 The primary objective of this scoping review is to develop a comprehensive inventory of  
18  
19 118 clinical outcome assessments in clinical trials aimed at recovery of consciousness for patients  
20  
21 119 with DoC after TBI. Secondary objectives are to examine the trends in primary outcomes over  
22  
23 120 time and whether reporting of NINDS CDEs increased after their introduction in 2010 in studies  
24  
25 121 that received US federal funding.

## 28 122 **METHODS AND ANALYSIS**

29  
30  
31 123 A scoping review is an appropriate method to achieve the stated objectives because we  
32  
33 124 want to identify characteristics of clinical outcome assessments used to evaluate the recovery of  
34  
35 125 consciousness following a severe TBI.<sup>20</sup> The scoping review will be conducted based on the  
36  
37 126 Arksey and O'Malley<sup>21</sup> methodological framework that has been refined by Levac et al<sup>22</sup>. The  
38  
39 127 methodological framework for this review will include: 1) identify the research questions, 2)  
40  
41 128 identify relevant studies, 3) select studies, 4) chart the data, 5) collate, summarize and report  
42  
43 129 results, and 6) stakeholder engagement to drive knowledge translation.<sup>21,22</sup>

### 46 130 **1. Identify the Research Questions**

#### 48 131 ***Primary question***

- 50  
51 132 • What clinical outcome assessments have been used in published studies about recovery of  
52  
53 133 consciousness for adults with severe TBI in states of disordered consciousness?

#### 55 134 ***Secondary questions***

- 1  
2  
3 135 • How have the outcomes assessments used to measure DoC in adults with severe TBI  
4  
5  
6 136 changed over time?  
7  
8 137 • Did frequency of reporting clinical outcome assessments classified as NINDS CDEs  
9  
10 138 change after their introduction in 2010 among federally funded studies in the US?

## 12 139 2. Identify Relevant Studies

14 140 The search strategy was developed in collaboration with a research librarian. Our search terms  
15  
16  
17 141 are broad to identify all eligible studies. These search terms encompass three primary categories:  
18  
19 142 severe TBI, recovery of consciousness, and outcomes.

### 21 143 *Search terms*

22  
23  
24 144 An in-depth outline of the full search strategy is reported in Table 2.

25  
26 145 Table 2. Examples of the search strategy that will generate the articles to review for the research  
27 146 question.

| 28 Database | 29 Search Terms                                                                                                                                                                                                                                                                                                                                                                                                                                                                                                                                                                                                                                                                                                                                                                                                                       | 30 Customization                    |
|-------------|---------------------------------------------------------------------------------------------------------------------------------------------------------------------------------------------------------------------------------------------------------------------------------------------------------------------------------------------------------------------------------------------------------------------------------------------------------------------------------------------------------------------------------------------------------------------------------------------------------------------------------------------------------------------------------------------------------------------------------------------------------------------------------------------------------------------------------------|-------------------------------------|
| 31 Cochrane | 32 (“traumatic brain injury”) OR (coma) OR (“persistent vegetative state”) OR (“minimally conscious state”) OR (“consciousness disorder”) OR (“disorder* of consciousness”) AND ((recovery) OR (“activities of daily living”) OR (awareness) OR (wakefulness)) AND (“critical care outcome”) OR (“treatment outcome”) OR (“outcome assessment”) OR (evaluation) OR (assessment))                                                                                                                                                                                                                                                                                                                                                                                                                                                      | 33 1987-2020, all publication types |
| 34 Embase   | 35 ((exp traumatic brain injury/ OR traumatic brain injur*.ti,ab.) OR (exp coma/ OR coma*.ti,ab.) OR (exp persistent vegetative state/ OR persistent vegetative state*.ti,ab.) OR (exp minimally conscious state/ OR minimally conscious state*.ti,ab.) OR (exp consciousness disorder/ OR consciousness disorder*.ti,ab. OR disorder* of consciousness.ti,ab.)) AND ((exp convalescence/ OR convalescence.ti,ab. OR recover*.ti,ab.) OR (exp daily life activity/ OR daily life activit*.ti,ab. OR activit* of daily living.ti,ab.) OR (exp awareness/ OR awareness.ti,ab.) OR (exp wakefulness/ OR wakefulness.ti,ab.)) AND ((exp critical care outcome/ OR critical care outcome*.ti,ab.) OR (exp treatment outcome/ OR treatment outcome*.ti,ab.) OR (exp evaluation*.ti,ab.) OR (exp outcome assessment/ OR assessment*.ti,ab.)) | 36 English, 1986-2020               |
| 37 PsycInfo | 38 (SU (“traumatic brain injur*”) OR TI (“traumatic brain injur*”) OR AB (“traumatic brain injur*”) OR SU (coma*) OR TI (coma*) OR AB (coma*) OR SU (“persistent vegetative state*”) OR TI (“persistent                                                                                                                                                                                                                                                                                                                                                                                                                                                                                                                                                                                                                               | 39 1/1987-12/31/2020, English only  |

|        |                                                                                                                                                                                                                                                                                                                                                                                                                                                                                                                                                                                                                                                                                                                                                                                                                                                                                                                                                                                                                                                                                                       |                                                          |
|--------|-------------------------------------------------------------------------------------------------------------------------------------------------------------------------------------------------------------------------------------------------------------------------------------------------------------------------------------------------------------------------------------------------------------------------------------------------------------------------------------------------------------------------------------------------------------------------------------------------------------------------------------------------------------------------------------------------------------------------------------------------------------------------------------------------------------------------------------------------------------------------------------------------------------------------------------------------------------------------------------------------------------------------------------------------------------------------------------------------------|----------------------------------------------------------|
|        | <p>vegetative state*”) OR AB (“persistent vegetative state*”) OR SU (“minimally conscious state*”) OR TI (“minimally conscious state*”) OR AB (“minimally conscious state*”) OR SU (“consciousness disorder*”) OR TI (“consciousness disorder*”) OR AB (“consciousness disorder*”) OR SU (“disorder* of consciousness”) OR TI (“disorder* of consciousness”) OR AB (“disorder* of consciousness”) AND (SU (recover*) OR TI (recover*) OR AB (recover*) OR SU (“activit* of daily living”) OR TI (“activit* of daily living”) OR AB (“activit* of daily living”) OR SU (awareness) OR TI (awareness) OR AB (awareness) OR SU (wakefulness) OR TI (wakefulness) OR AB (wakefulness)) AND (SU (“critical care outcome*”) OR TI (“critical care outcome*”) OR AB (“critical care outcome*”) OR SU (“treatment outcome*”) OR TI (“treatment outcome*”) OR AB (“treatment outcome*”) OR SU (“outcome assessment*”) OR TI (“outcome assessment*”) OR AB (“outcome assessment*”) OR SU (evaluation*) OR TI (evaluation*) OR AB (evaluation*) OR SU (assessment*) OR TI (assessment*) OR AB (assessment*))</p> |                                                          |
| PubMed | <p>(Severe Traumatic Brain Injury [tiab] OR Brain Injuries, Traumatic [mesh] OR traumatic brain injury [tiab] OR coma, post-head injury [mesh] OR persistent vegetative state [mesh] OR minimally conscious state [tiab] OR consciousness disorders [mesh] OR disorders of consciousness [tiab]) AND (recovery [tiab] OR recovery of function [mesh] OR activities of daily living [mesh] OR awareness [mesh] OR awareness [tiab] OR wakefulness [mesh] OR wakefulness [tiab]) AND (Critical care outcomes [mesh] OR treatment outcome [mesh] OR "outcome assessment (health care)" [mesh] OR disability evaluation [mesh] OR evaluation [tiab] OR patient outcome assessment [mesh] OR assessment [tiab])</p>                                                                                                                                                                                                                                                                                                                                                                                        | <p>Humans,<br/>English,<br/>1/1/1986-<br/>12/31/2020</p> |
| Scopus | <p>(TITLE-ABS-KEY (“traumatic brain injur*”) OR TITLE-ABS-KEY (coma*) OR TITLE-ABS-KEY (“persistent vegetative state*”) OR TITLE-ABS-KEY (“minimally conscious state*”) OR TITLE-ABS-KEY (“consciousness disorder*”) OR TITLE-ABS-KEY (“disorder* of consciousness”)) AND (TITLE-ABS-KEY (recover*) OR TITLE-ABS-KEY (“activit* of daily living”) OR TITLE-ABS-KEY (awareness) OR TITLE-ABS-KEY (wakefulness)) AND (TITLE-ABS-KEY (“critical care outcome*”) OR TITLE-ABS-KEY (“treatment outcome*”) OR TITLE-ABS-KEY (“outcome assessment*”) OR TITLE-ABS-KEY (evaluation*) OR TITLE-ABS-KEY (assessment*))</p>                                                                                                                                                                                                                                                                                                                                                                                                                                                                                      | <p>English</p>                                           |

147 \*Search dates will include January 1, 1986 to December 31, 2020

148 **Information sources**



1  
2  
3 149 We will search the following electronic bibliographic databases: PubMed, Scopus, EMBASE,  
4  
5 150 PsycINFO, and The Cochrane Library (including Cochrane Database of Systematic Reviews,  
6  
7 151 Cochrane Central Register of Controlled Trials, and Cochrane Methodology Register).  
8  
9

10 152 ***Synthesis of eligibility criteria***  
11

12 153 This review will include all published, peer-reviewed studies using an intervention/treatment to  
13  
14 154 facilitate recovery of consciousness for adults ( $\geq 18$  years) with DoC following severe TBI  
15  
16  
17 155 (Table 3).  
18  
19  
20  
21  
22  
23  
24  
25  
26  
27  
28  
29  
30  
31  
32  
33  
34  
35  
36  
37  
38  
39  
40  
41  
42  
43  
44  
45  
46  
47  
48  
49  
50  
51  
52  
53  
54  
55  
56  
57  
58  
59  
60

176 Table 3. Inclusion and exclusion criteria for the scoping review.

| Category                      | Inclusion Criteria                                                                                                                                                                                                                                                                                                              | Exclusion Criteria                                                                                                                                                                                                                                                                 |
|-------------------------------|---------------------------------------------------------------------------------------------------------------------------------------------------------------------------------------------------------------------------------------------------------------------------------------------------------------------------------|------------------------------------------------------------------------------------------------------------------------------------------------------------------------------------------------------------------------------------------------------------------------------------|
| <b>Language</b>               | English                                                                                                                                                                                                                                                                                                                         |                                                                                                                                                                                                                                                                                    |
| <b>Publication Date Range</b> | January 1986 to December 2020                                                                                                                                                                                                                                                                                                   | Before 1986                                                                                                                                                                                                                                                                        |
| <b>Participant Age</b>        | Participant age: $\geq 18$ years of age<br>At least one participant in the study was $\geq 18$ years of age                                                                                                                                                                                                                     | All participants were under 18 years of age                                                                                                                                                                                                                                        |
| <b>Participant Diagnosis</b>  | Participant diagnosis: Disordered Consciousness (DoC) following severe TBI<br>DoC was established utilizing a known assessment for evaluating states of consciousness such as the Coma Recovery Scale-Revised (CRS-R) or Glasgow Coma Scale $\leq 8$<br>At least one participant in the study was diagnosed with DoC from a TBI | Participants had brain pathologies such as Alzheimer's Disease or non-traumatic brain injury, and/or were conscious, alert, and oriented<br>Participants had a Diagnostics and Statistical Manual of Mental Disorders (5 <sup>th</sup> edition) diagnosis of psychiatric disorders |
| <b>Intervention</b>           | Intervention aimed at facilitating recovery of consciousness                                                                                                                                                                                                                                                                    | Purpose of intervention was not described as facilitating recovery of consciousness                                                                                                                                                                                                |
| <b>Study Design</b>           | All designs of primary, peer-reviewed studies including randomized control trials, observational studies, cohort studies, case control studies, case series, and case reports                                                                                                                                                   | Qualitative studies; meta-analyses, systematic reviews, and scoping reviews                                                                                                                                                                                                        |

177

178 *Language:* English179 *Publication date:* January 1986 to December 2020

180 *Study Design:* This review will consider all designs of peer-reviewed studies including  
 181 randomized control trials, observational studies, cohort studies, case control studies, case series,  
 182 and case reports. Meta-analyses and review articles will be excluded.

183 *Setting:* This review will include intervention studies delivered in any setting to adults with DoC  
184 following a severe TBI. There is no restriction on country of origin.

185 *Participants:* For a study to be included in this review, at least one participant in the study must  
186 have DoC following a severe TBI. A severe TBI resulting in DoC is defined as: a) Glasgow  
187 Coma Scale (GCS) score of 3-8<sup>12</sup> or b) an assessment known for evaluating states of  
188 consciousness, such as the CRS-R.<sup>5,8</sup> Studies will be excluded if all participants were under 18  
189 years of age, had a Diagnostic and Statistical Manual of Mental Disorders (5<sup>th</sup> edition) diagnosis  
190 of a psychiatric disorder, had brain pathologies such as Alzheimer's Disease or non-traumatic  
191 brain injury, or were conscious, alert, and oriented. All non-human studies will be excluded.

192 *Interventions:* Examples of interventions to be included are medication, nutrition, rehabilitation  
193 therapy, non-invasive brain stimulation, and surgery. Studies will be excluded if the purpose of  
194 the intervention/treatment provided was not described as facilitating recovery of consciousness.

### 195 **3. Select Studies**

196 Following the search, each identified article will be uploaded to Endnote, a reference  
197 management system. Duplicate articles will be removed. Titles and abstracts will be screened by  
198 two independent reviewers to assess whether articles meet inclusion criteria (Table 4). If studies  
199 are meta-analyses or reviews that are relevant to the research question, we will search the  
200 reference list. Articles that are included by the screening process will undergo a full text review.  
201 Two independent reviewers will read the full text articles to make a final determination of  
202 inclusion. Articles that do not meet inclusion criteria at this stage will be excluded from the final  
203 sample, with rationale documented. Discrepancies about inclusion of articles will be resolved  
204 through further discussion and/or input by a third reviewer.

206 Table 4. Title and abstract review form

| Questions                                                                      |                                                                                                                           |
|--------------------------------------------------------------------------------|---------------------------------------------------------------------------------------------------------------------------|
| 1. Is the article written in English?                                          | <input type="checkbox"/> Yes<br><input type="checkbox"/> No                                                               |
| 2. Is the article published after 1985?                                        | <input type="checkbox"/> Yes<br><input type="checkbox"/> No                                                               |
| 3. Is the article about human subjects?                                        | <input type="checkbox"/> Yes<br><input type="checkbox"/> No                                                               |
| a. Are the human subject's adults ( $\geq 18$ years)                           | <input type="checkbox"/> Yes<br><input type="checkbox"/> No<br><input type="checkbox"/> Unsure, requires full text review |
| b. Do the adults have a traumatic brain injury?                                | <input type="checkbox"/> Yes<br><input type="checkbox"/> No<br><input type="checkbox"/> Unsure, requires full text review |
| c. Are the adults unconscious?                                                 | <input type="checkbox"/> Yes<br><input type="checkbox"/> No<br><input type="checkbox"/> Unsure, requires full text review |
| 4. Is the article about an intervention?                                       | <input type="checkbox"/> Yes<br><input type="checkbox"/> No<br><input type="checkbox"/> Unsure, requires full text review |
| a. Is the purpose of the intervention to facilitate recovery of consciousness? | <input type="checkbox"/> Yes<br><input type="checkbox"/> No<br><input type="checkbox"/> Unsure, requires full text review |
| b. Is it a meta-analysis, scoping review, or systematic review?                | <input type="checkbox"/> Yes → Exclude & search the reference list.<br><input type="checkbox"/> No                        |

207

208 **4. Chart the Data**

209 Data will be extracted from included articles by independent reviewers using a uniform data  
 210 extraction tool developed for the study. A sample data extraction table is shown in Table 5.  
 211 Reviewers will use the Scottish Intercollegiate Guideline Network (SIGN) rating form to  
 212 evaluate study quality.<sup>23</sup> Consistent with the SIGN protocol, case study designs will not be

1  
2  
3 213 evaluated for quality; other studies' methodological quality will be rated as high, acceptable,  
4  
5 214 low, or unacceptable-reject.<sup>23</sup> For each included article, data extraction will include details about  
6  
7 215 the year of publication, funding source, study aims, study design, number of participants  
8  
9 216 (including number lost to follow up), recruitment, study completion rate, demographics (age,  
10  
11 217 injury severity, days post-injury) of participants, clinical setting, specific intervention (including  
12  
13 218 control conditions, if applicable), primary and secondary outcomes, timing, and location of  
14  
15 219 outcomes.  
16  
17  
18  
19  
20  
21  
22  
23  
24  
25  
26  
27  
28  
29  
30  
31  
32  
33  
34  
35  
36  
37  
38  
39  
40  
41  
42  
43  
44  
45  
46  
47  
48  
49  
50  
51  
52  
53  
54  
55  
56  
57  
58  
59  
60

221 Table 5. Data extraction form for full text review.

|                                                                                                                                                                                                                                                                                                                                                                                                                                      |  |
|--------------------------------------------------------------------------------------------------------------------------------------------------------------------------------------------------------------------------------------------------------------------------------------------------------------------------------------------------------------------------------------------------------------------------------------|--|
| <b>Study Information</b>                                                                                                                                                                                                                                                                                                                                                                                                             |  |
| Study Title                                                                                                                                                                                                                                                                                                                                                                                                                          |  |
| Year                                                                                                                                                                                                                                                                                                                                                                                                                                 |  |
| Funding Source                                                                                                                                                                                                                                                                                                                                                                                                                       |  |
| <b>Inclusion/Exclusion Criteria</b>                                                                                                                                                                                                                                                                                                                                                                                                  |  |
| Is the paper relevant to our research question, "What are the content areas of outcomes related to recovery of consciousness that have been used in clinical trials and/or intervention studies for adults with severe traumatic brain injury (TBI) in disorders of consciousness (DoC)?" (i.e., there are outcome measures for people in DoC following an intervention)                                                             |  |
| <p>Inclusion Criteria:</p> <ul style="list-style-type: none"> <li>• Adults (<math>\geq 18</math> years) with primary diagnosis of severe TBI;</li> <li>• Identified brain injury is noted to be severe by Glasgow Coma Scale of 8 or less;</li> <li>• At least one of the study participants are in DoC following a TBI;</li> <li>• Addressed outcome related to recovery of consciousness;</li> <li>• Written in English</li> </ul> |  |
| <p>Exclusion Criteria:</p> <ul style="list-style-type: none"> <li>• People with documented history of psychiatric illness (DSM criteria), and/or organic brain syndrome such as Alzheimer’s Disease.</li> <li>• All study participants are fully conscious;</li> <li>• All study participants are <math>&lt; 18</math> years of age;</li> <li>• Study participants include non-traumatic brain injury <i>only</i></li> </ul>         |  |
| <b>Study Details</b>                                                                                                                                                                                                                                                                                                                                                                                                                 |  |
| Study design                                                                                                                                                                                                                                                                                                                                                                                                                         |  |
| Sample/number of participants: Include sample size and diagnoses (i.e., DoC following TBI, stroke, anoxia)                                                                                                                                                                                                                                                                                                                           |  |
| Sample/demographics: age, injury severity, days post injury (if reported)                                                                                                                                                                                                                                                                                                                                                            |  |

|    |                                                                                                         |  |
|----|---------------------------------------------------------------------------------------------------------|--|
| 1  | Sample: The study's inclusion criteria                                                                  |  |
| 2  |                                                                                                         |  |
| 3  | Sample: The study's exclusion criteria                                                                  |  |
| 4  |                                                                                                         |  |
| 5  | <b>Data Collection Procedures</b>                                                                       |  |
| 6  |                                                                                                         |  |
| 7  | Intervention characteristics (intervention(s), control condition(s), duration and protocol information) |  |
| 8  |                                                                                                         |  |
| 9  | Primary outcome measure                                                                                 |  |
| 10 |                                                                                                         |  |
| 11 | Context of use for primary outcome measure                                                              |  |
| 12 |                                                                                                         |  |
| 13 | Endpoint measure                                                                                        |  |
| 14 |                                                                                                         |  |
| 15 | Secondary outcome measures                                                                              |  |
| 16 |                                                                                                         |  |
| 17 | Were outcome measures transformed? (Yes/No)                                                             |  |
| 18 |                                                                                                         |  |
| 19 | Timing of outcome measures                                                                              |  |
| 20 | <b>Results</b>                                                                                          |  |
| 21 | Observed sample                                                                                         |  |
| 22 |                                                                                                         |  |
| 23 | Number of excluded participants                                                                         |  |
| 24 |                                                                                                         |  |
| 25 | Number of participants lost to follow up                                                                |  |
| 26 |                                                                                                         |  |
| 27 | Primary Outcome (mean, proportion, other effect size index)                                             |  |
| 28 |                                                                                                         |  |
| 29 | Statistical analyses (description of groups, comparison of groups)                                      |  |
| 30 |                                                                                                         |  |
| 31 | Key Findings                                                                                            |  |
| 32 |                                                                                                         |  |
| 33 | <b>**Complete SIGN Quality Rating Based on Study Design</b>                                             |  |
| 34 |                                                                                                         |  |
| 35 |                                                                                                         |  |
| 36 |                                                                                                         |  |
| 37 |                                                                                                         |  |
| 38 |                                                                                                         |  |
| 39 |                                                                                                         |  |
| 40 |                                                                                                         |  |
| 41 |                                                                                                         |  |
| 42 |                                                                                                         |  |
| 43 |                                                                                                         |  |
| 44 |                                                                                                         |  |
| 45 |                                                                                                         |  |
| 46 |                                                                                                         |  |
| 47 |                                                                                                         |  |

## 223 5. Collate, Summarize and Report Information

### 224 *Data analysis*

225 We will transfer information from the data extraction forms into STATA to complete descriptive  
226 analyses. We will categorize studies based on sample size and report this information. We will  
227 also categorize studies into five groups (high, acceptable, low, unacceptable-reject or not rated)  
228 based on quality rating using SIGN criteria. We will examine whether sample size or quality  
229 rating biases results regarding frequency of clinical outcome assessment as well as utilization of  
230 CDEs.

### 231 **Conceptual Framework and Key Concepts**

#### 232 *World Health Organization International Classification of Functioning, Disability and*

233 *Health*: Clinical outcome assessments will be categorized based on the World Health

234 Organization (WHO) International Classification of Functioning, Disability and Health (ICF)

235 framework using relevant concept of interest. This framework has two major components:

236 *Functioning and Disability* which includes the domains of Body Function, Body Structure, and

237 Activities and Participation that impact an individual's daily life; and *Contextual Factors* which

238 includes the domains of Personal Factors and Environmental Factors. Environmental Factors

239 consider the "physical, social and attitudinal environment in which people live and conduct their

240 lives."<sup>24</sup> Personal Factors include age, gender, and education; we will not apply this domain in

241 classifying outcome assessments since these generally represent covariates rather than

242 outcomes/endpoints.

243 Clinical outcome assessments will first be categorized into one of the four relevant WHO ICF

244 domains (body structures, body functions, activities and participation, environmental factors)

245 based on the concept of interest they are intended to measure. These categorizations will be



1  
2  
3 246 mutually exclusive in that each outcome assessment will only be assigned to one domain. ICF  
4  
5 247 domains can be further classified into subdomains.<sup>24</sup> We will also assign each outcome  
6  
7 248 assessment to a relevant sub-domain. Should an outcome assessment not fit into a WHO ICF  
8  
9 249 domain, we will create an ‘Other’ domain. Once all outcome assessments are categorized to a  
10  
11 250 domain, we will thematically analyze the outcome assessments in the ‘Other’ domain to  
12  
13 251 determine if a new domain is needed. For example, previous literature argues for the inclusion of  
14  
15 252 quality of life as a domain.<sup>25</sup>

16  
17 253 **Common Data Elements:** We will categorize outcome assessments as to whether they are a  
18  
19 254 NINDS CDE for moderate/severe TBI. We will test the significance of the introduction for  
20  
21 255 CDEs on outcome reporting before and after 2010 using a chi-square test.

### 22 256 **Presentation of results**

23  
24 257 Results will be presented via detailed quantitative and narrative summaries. First, we will present  
25  
26 258 the PRISMA-Scr flow diagram demonstrating the inclusion of studies,<sup>26,27</sup> including how many  
27  
28 259 articles were retrieved from each database. We will also create an outcome map table that  
29  
30 260 categorizes outcome assessments by WHO ICF domain and sub-domain. We will create two  
31  
32 261 figures to display (1) the frequency of WHO ICF sub-domains to show the gaps in the concepts  
33  
34 262 of interest that outcome assessments address by domain, and (2) the number and percent of  
35  
36 263 studies that received US federal funding by year to show the proportion that used a CDE as a  
37  
38 264 primary outcome. In addition, we will present a 2x2 table of CDE status and whether the  
39  
40 265 publication was pre/post the introduction of CDEs.

### 41 266 **Stakeholder Engagement**

42  
43 267 Clinicians and researchers with extensive experience treating and studying recovery of  
44  
45 268 consciousness following a TBI have been involved in the development of this scoping review  
46  
47  
48  
49  
50  
51  
52  
53  
54  
55  
56  
57  
58  
59  
60

1  
2  
3 269 protocol. We have formed the Recovery of Consciousness (RECON) study team to continuously  
4  
5 270 engage these stakeholders throughout the scoping review process, inclusive of study selection  
6  
7  
8 271 through dissemination of results.  
9

## 10 272 **Patient and Public Involvement**

11  
12 273 No patient involvement.  
13

## 14 274 **ETHICS AND DISSEMINATION**

15  
16  
17 275 No ethical approval is required for this study as it is not determined to be human subjects  
18  
19 276 research. Results will be presented at a national rehabilitation conference and submitted to a  
20  
21 277 peer-reviewed journal for publication.  
22

### 23 278 ***Reporting of protocol and study records***

24  
25  
26 279 We registered this scoping review with PROSPERO (CRD42017058383). This study protocol  
27  
28 280 and future reports will follow PRISMA-ScR guidelines for the publication of scoping reviews.<sup>26</sup>  
29  
30  
31  
32  
33  
34  
35  
36  
37  
38  
39  
40  
41  
42  
43  
44  
45  
46  
47  
48  
49  
50  
51  
52  
53  
54  
55  
56  
57  
58  
59  
60

1  
2  
3 281 **Contributorship statement:** All authors meet ICJME authorship criteria. Below we provide  
4  
5 282 specific details on how each author has met the four ICJME criteria for authorship.

6  
7  
8 283 Criteria #1: Substantial contributions to the conception or design of the work; or the acquisition,  
9  
10 284 analysis, or interpretation of data for the work.

11  
12 285 Contributions to the conception of the work: Jennifer Weaver, Ann Guernon, Theresa  
13  
14 286 Bender Pape, and Trudy Mallinson; Contributions to the design of the work: Jennifer Weaver,  
15  
16 287 Alison Cogan, Tom Harrod, and Trudy Mallinson; Contributions to the acquisition of data: Tom  
17  
18 288 Harrod and Jennifer Weaver; Contributions to the analytic plan: Jennifer Weaver, Trudy  
19  
20 289 Mallinson, Alison Cogan, Parie Bhandari, Bint-e Awan, Erica Jacobs, Ariana Pape, Chantal  
21  
22 290 Nguyen, Ann Guernon, and the Recon Team.

23  
24  
25  
26 291 Criteria #2: Drafting the work (i.e., protocol paper) or revising it critically for important  
27  
28 292 intellectual content.

29  
30  
31 293 Drafting of the protocol paper: Jennifer Weaver, Alison Cogan, Parie Bhandari, Bint-e  
32  
33 294 Awan, Erica Jacobs, Ariana Pape, Chantal Nguyen, and Trudy Mallinson; Critically revising the  
34  
35 295 protocol paper for important intellectual content: Ann Guernon, Theresa Bender Pape, Tom  
36  
37 296 Harrod, and the Recon Team

38  
39  
40 297 Criteria # 3: Final approval of the version to be published; AND Criteria #4: Agreement to be  
41  
42 298 accountable for all aspects of the work in ensuring that questions related to the accuracy or  
43  
44 299 integrity or any part of the work are appropriately investigated and resolved.

45  
46  
47 300 All authors provided final approval of the version to be published and are in agreement to  
48  
49 301 be accountable for all aspects of the work.

50  
51 302 **Competing interests:** Authors have no disclosures.  
52  
53  
54  
55  
56  
57  
58  
59  
60

1  
2  
3  
4  
5  
6  
7  
8  
9  
10  
11  
12  
13  
14  
15  
16  
17  
18  
19  
20  
21  
22  
23  
24  
25  
26  
27  
28  
29  
30  
31  
32  
33  
34  
35  
36  
37  
38  
39  
40  
41  
42  
43  
44  
45  
46  
47  
48  
49  
50  
51  
52  
53  
54  
55  
56  
57  
58  
59  
60

303 **Funding:** This work was supported by the US Department of Defense under Grant W81XWH-  
304 14-1-0568; US Department of Defense under Grant JW150040.

For peer review only

1  
2  
3 305 **References**

- 4 306 1. Giacino JT, Whyte J, Bagiella E, et al. Placebo-controlled trial of amantadine for severe  
5  
6 307 traumatic brain injury. *New England Journal of Medicine*. 2012;366(9):819-826.
- 8  
9 308 2. Bender Pape TL, Livengood SL, Kletzel SL, et al. Neural Connectivity Changes  
10  
11 309 Facilitated by Familiar Auditory Sensory Training in Disordered Consciousness: A TBI  
12  
13 310 Pilot Study. *Frontiers in Neurology*. 2020;11(1027).
- 15  
16 311 3. Bender Pape TL, Rosenow JM, Steiner M, et al. Placebo-Controlled Trial of Familiar  
17  
18 312 Auditory Sensory Training for Acute Severe Traumatic Brain Injury: A Preliminary  
19  
20 313 Report. *Neurorehabilitation and neural repair*. 2015;29(6):537-547.
- 22  
23 314 4. Giacino JT, Whyte J, Nakase-Richardson R, et al. Minimum Competency  
24  
25 315 Recommendations for Programs That Provide Rehabilitation Services for Persons With  
26  
27 316 Disorders of Consciousness: A Position Statement of the American Congress of  
28  
29 317 Rehabilitation Medicine and the National Institute on Disability, Independent Living and  
30  
31 318 Rehabilitation Research Traumatic Brain Injury Model Systems. *Archives of physical*  
32  
33 319 *medicine and rehabilitation*. 2020;101(6):1072-1089.
- 35  
36 320 5. Giacino JT, Katz DI, Schiff ND, et al. Practice Guideline Update Recommendations  
37  
38 321 Summary: Disorders of Consciousness: Report of the Guideline Development,  
39  
40 322 Dissemination, and Implementation Subcommittee of the American Academy of  
41  
42 323 Neurology; the American Congress of Rehabilitation Medicine; and the National Institute  
43  
44 324 on Disability, Independent Living, and Rehabilitation Research. *Archives of physical*  
45  
46 325 *medicine and rehabilitation*. 2018;99(9).
- 48  
49  
50 326 6. Hammond F, Giacino J, Nakase-Richardson R, et al. Disorders of Consciousness due to  
51  
52 327 Traumatic Brain Injury: Functional Status Ten Years Post-Injury. *J Neurotrauma*. 2018.
- 53  
54  
55  
56  
57  
58  
59  
60

- 1  
2  
3 328 7. Giacino JT, Katz DI, Schiff ND, et al. Comprehensive Systematic Review Update  
4  
5 329 Summary: Disorders of Consciousness: Report of the Guideline Development,  
6  
7  
8 330 Dissemination, and Implementation Subcommittee of the American Academy of  
9  
10 331 Neurology; the American Congress of Rehabilitation Medicine; and the National Institute  
11  
12 332 on Disability, Independent Living, and Rehabilitation Research. *Archives of physical*  
13  
14 333 *medicine and rehabilitation*. 2018;99(9):1710-1719.
- 16 334 8. American Congress of Rehabilitation Medicine BI-ISIGDoCTF, Seel RT, Sherer M, et al.  
17  
18  
19 335 Assessment scales for disorders of consciousness: evidence-based recommendations for  
20  
21 336 clinical practice and research. *Archives of physical medicine and rehabilitation*.  
22  
23 337 2010;91(12):1795-1813.
- 25 338 9. Claassen J, Akbari Y, Alexander S, et al. Proceedings of the First Curing Coma  
26  
27  
28 339 Campaign NIH Symposium: Challenging the Future of Research for Coma and Disorders  
29  
30 340 of Consciousness. *Neurocritical care*. 2021;35(1):4-23.
- 32 341 10. Provencio JJ, Hemphill JC, Claassen J, et al. The Curing Coma Campaign: Framing  
33  
34 342 Initial Scientific Challenges-Proceedings of the First Curing Coma Campaign Scientific  
35  
36 343 Advisory Council Meeting. *Neurocritical care*. 2020;33(1):1-12.
- 38 344 11. Maas AIMD, Harrison-Felix CLP, Menon DMD, et al. Common Data Elements for  
39  
40 345 Traumatic Brain Injury: Recommendations From the Interagency Working Group on  
41  
42 346 Demographics and Clinical Assessment. *Archives of physical medicine and*  
43  
44 347 *rehabilitation*. 2010;91(11):1641-1649.
- 46 348 12. Maas AIR, Harrison-Felix CL, Menon D, et al. Standardizing Data Collection in  
47  
48 349 Traumatic Brain Injury. *Journal of Neurotrauma*. 2011;28(2):177-187.
- 50  
51  
52  
53  
54  
55  
56  
57  
58  
59  
60

- 1  
2  
3 350 13. Yue JK, Vassar MJ, Lingsma HF, et al. Transforming Research and Clinical Knowledge  
4  
5 351 in Traumatic Brain Injury Pilot: Multicenter Implementation of the Common Data  
6  
7 352 Elements for Traumatic Brain Injury. *Journal of neurotrauma*. 2013;30(22):1831-1844.  
8  
9  
10 353 14. Thurmond VA, Hicks R, Gleason T, et al. Advancing Integrated Research in  
11  
12 354 Psychological Health and Traumatic Brain Injury: Common Data Elements. *Archives of*  
13  
14 355 *physical medicine and rehabilitation*. 2010;91(11):1633-1636.  
15  
16  
17 356 15. Thompson HJ, Vavilala MS, Rivara FP. Chapter 1 Common Data Elements and Federal  
18  
19 357 Interagency Traumatic Brain Injury Research Informatics System for TBI Research.  
20  
21 358 *Annual review of nursing research*. 2015;33:1-11.  
22  
23  
24 359 16. Hicks R, Giacino J, Harrison-Felix C, Manley G, Valadka A, Wilde EA. Progress in  
25  
26 360 developing common data elements for traumatic brain injury research: Version two—The  
27  
28 361 end of the beginning. *Journal of neurotrauma*. 2013;30(22):1852-1861.  
29  
30  
31 362 17. Sheehan J, Hirschfeld S, Foster E, et al. Improving the value of clinical research through  
32  
33 363 the use of Common Data Elements. *Clinical Trials*. 2016;13(6):671-676.  
34  
35  
36 364 18. National Institute of Neurological Disorders and Stroke. Common Data Elements Search.  
37  
38 365 Common Data Elements Web site. <https://www.commondataelements.ninds.nih.gov/>.  
39  
40 366 Published 2021. Accessed July 15, 2021.  
41  
42 367 19. Stead LG, Bodhit AN, Patel PS, et al. TBI surveillance using the common data elements  
43  
44 368 for traumatic brain injury: a population study. *International Journal of Emergency*  
45  
46 369 *Medicine*. 2013;6(1):5.  
47  
48  
49 370 20. Munn Z, Peters MDJ, Stern C, Tufanaru C, McArthur A, Aromataris E. Systematic  
50  
51 371 review or scoping review? Guidance for authors when choosing between a systematic or  
52  
53 372 scoping review approach. *BMC Medical Research Methodology*. 2018;18(1):143.  
54  
55  
56  
57  
58  
59  
60

- 1  
2  
3 373 21. Arksey H, O'Malley L. Scoping studies: towards a methodological framework. *Int J Soc*  
4  
5 374 *Res Methodol.* 2005;8.  
6  
7  
8 375 22. Levac D, Colquhoun H, O'Brien K. Scoping studies: advancing the methodology.  
9  
10 376 *Implement Sci.* 2010;5.  
11  
12 377 23. Scottish Intercollegiate Guideline Network. Critical appraisal notes and checklists. SIGN.  
13  
14 378 <https://www.sign.ac.uk/checklists-and-notes.html>. Published 2001. Accessed March 22,  
15  
16 379 2020.  
17  
18  
19 380 24. World Health Organization. Towards a Common Language for Functioning, Disability  
20  
21 381 and Health: The International Classification of Functioning, Disability and Health. In.  
22  
23 382 Geneva2002.  
24  
25  
26 383 25. McDougall J, Wright V, Rosenbaum P. The ICF model of functioning and disability:  
27  
28 384 incorporating quality of life and human development. *Dev Neurorehabil.* 2010;13(3):204-  
29  
30 385 211.  
31  
32  
33 386 26. Tricco AC, Lillie E, Zarin W, et al. PRISMA Extension for Scoping Reviews (PRISMA-  
34  
35 387 ScR): Checklist and Explanation. *Annals of Internal Medicine.* 2018;169(7):467-473.  
36  
37  
38 388 27. Liberati A, Altman DG, Tetzlaff J, et al. The PRISMA statement for reporting systematic  
39  
40 389 reviews and meta-analyses of studies that evaluate healthcare interventions: explanation  
41  
42 390 and elaboration. *BMJ.* 2009;339:b2700.  
43  
44  
45 391  
46  
47 392  
48  
49  
50  
51  
52  
53  
54  
55  
56  
57  
58  
59  
60



393

For peer review only

**PRISMA-P (Preferred Reporting Items for Systematic review and Meta-Analysis Protocols) 2015 checklist: recommended items to address in a systematic review protocol\***

| Section and topic                 | Item No | Checklist item                                                                                                                                                                                                                | Page or Line number (using clean copy) |
|-----------------------------------|---------|-------------------------------------------------------------------------------------------------------------------------------------------------------------------------------------------------------------------------------|----------------------------------------|
| <b>ADMINISTRATIVE INFORMATION</b> |         |                                                                                                                                                                                                                               |                                        |
| Title:                            |         |                                                                                                                                                                                                                               |                                        |
| Identification                    | 1a      | Identify the report as a protocol of a systematic review                                                                                                                                                                      | Lines 1-2                              |
| Update                            | 1b      | If the protocol is for an update of a previous systematic review, identify as such                                                                                                                                            | N/A                                    |
| Registration                      | 2       | If registered, provide the name of the registry (such as PROSPERO) and registration number                                                                                                                                    | Line 279                               |
| Authors:                          |         |                                                                                                                                                                                                                               |                                        |
| Contact                           | 3a      | Provide name, institutional affiliation, e-mail address of all protocol authors; provide physical mailing address of corresponding author                                                                                     | Title page                             |
| Contributions                     | 3b      | Describe contributions of protocol authors and identify the guarantor of the review                                                                                                                                           | Lines 12-15; 281-302                   |
| Amendments                        | 4       | If the protocol represents an amendment of a previously completed or published protocol, identify as such and list changes; otherwise, state plan for documenting important protocol amendments                               | N/A                                    |
| Support:                          |         |                                                                                                                                                                                                                               |                                        |
| Sources                           | 5a      | Indicate sources of financial or other support for the review                                                                                                                                                                 | Lines 303-304                          |
| Sponsor                           | 5b      | Provide name for the review funder and/or sponsor                                                                                                                                                                             | Lines 303-304                          |
| Role of sponsor or funder         | 5c      | Describe roles of funder(s), sponsor(s), and/or institution(s), if any, in developing the protocol                                                                                                                            | N/A                                    |
| <b>INTRODUCTION</b>               |         |                                                                                                                                                                                                                               |                                        |
| Rationale                         | 6       | Describe the rationale for the review in the context of what is already known                                                                                                                                                 | Lines 72-115                           |
| Objectives                        | 7       | Provide an explicit statement of the question(s) the review will address with reference to participants, interventions, comparators, and outcomes (PICO)                                                                      | Lines 116-121                          |
| <b>METHODS</b>                    |         |                                                                                                                                                                                                                               |                                        |
| Eligibility criteria              | 8       | Specify the study characteristics (such as PICO, study design, setting, time frame) and report characteristics (such as years considered, language, publication status) to be used as criteria for eligibility for the review | Lines 123-194                          |
| Information sources               | 9       | Describe all intended information sources (such as electronic databases, contact with study authors, trial registers or other grey literature sources) with planned dates of coverage                                         | Lines 139-151                          |
| Search strategy                   | 10      | Present draft of search strategy to be used for at least one electronic database, including planned limits,                                                                                                                   | Lines 143-147                          |

|                                    |     |                                                                                                                                                                                                                                                  |                                                                                                        |
|------------------------------------|-----|--------------------------------------------------------------------------------------------------------------------------------------------------------------------------------------------------------------------------------------------------|--------------------------------------------------------------------------------------------------------|
|                                    |     | such that it could be repeated                                                                                                                                                                                                                   |                                                                                                        |
| Study records:                     |     |                                                                                                                                                                                                                                                  |                                                                                                        |
| Data management                    | 11a | Describe the mechanism(s) that will be used to manage records and data throughout the review                                                                                                                                                     | Lines 196-197                                                                                          |
| Selection process                  | 11b | State the process that will be used for selecting studies (such as two independent reviewers) through each phase of the review (that is, screening, eligibility and inclusion in meta-analysis)                                                  | Lines 197-204                                                                                          |
| Data collection process            | 11c | Describe planned method of extracting data from reports (such as piloting forms, done independently, in duplicate), any processes for obtaining and confirming data from investigators                                                           | Lines 206-223                                                                                          |
| Data items                         | 12  | List and define all variables for which data will be sought (such as PICO items, funding sources), any pre-planned data assumptions and simplifications                                                                                          | Lines 206-223                                                                                          |
| Outcomes and prioritization        | 13  | List and define all outcomes for which data will be sought, including prioritization of main and additional outcomes, with rationale                                                                                                             | Lines 208-223                                                                                          |
| Risk of bias in individual studies | 14  | Describe anticipated methods for assessing risk of bias of individual studies, including whether this will be done at the outcome or study level, or both; state how this information will be used in data synthesis                             | Lines 208-222 and 223-230                                                                              |
| Data synthesis                     | 15a | Describe criteria under which study data will be quantitatively synthesised                                                                                                                                                                      |                                                                                                        |
|                                    | 15b | If data are appropriate for quantitative synthesis, describe planned summary measures, methods of handling data and methods of combining data from studies, including any planned exploration of consistency (such as $I^2$ , Kendall's $\tau$ ) |                                                                                                        |
|                                    | 15c | Describe any proposed additional analyses (such as sensitivity or subgroup analyses, meta-regression)                                                                                                                                            |                                                                                                        |
|                                    | 15d | If quantitative synthesis is not appropriate, describe the type of summary planned                                                                                                                                                               | Lines 223-230; 243-252; 253-256; 257-265 (Scoping review quantitative and narrative summaries planned) |
| Meta-bias(es)                      | 16  | Specify any planned assessment of meta-bias(es) (such as publication bias across studies, selective reporting within studies)                                                                                                                    | Lines 228-230                                                                                          |
| Confidence in cumulative evidence  | 17  | Describe how the strength of the body of evidence will be assessed (such as GRADE)                                                                                                                                                               | Lines 211-214 and Table 5                                                                              |

**\* It is strongly recommended that this checklist be read in conjunction with the PRISMA-P Explanation and Elaboration (cite when available) for important clarification on the items. Amendments to a review protocol should be tracked and dated. The copyright for PRISMA-P (including checklist) is held by the PRISMA-P Group and is distributed under a Creative Commons Attribution Licence 4.0.**

*From: Shamseer L, Moher D, Clarke M, Ghersi D, Liberati A, Petticrew M, Shekelle P, Stewart L, PRISMA-P Group. Preferred reporting items for systematic review and meta-analysis protocols (PRISMA-P) 2015: elaboration and explanation. BMJ. 2015 Jan 2;349(jan02 1):g7647.*
